# Supplementary material for: The potential impact of novel tuberculosis vaccines on health equity and financial protection in low-income and middle-income countries
Source: PubMed Central journal article supplement (PMC10347450; doi:10.1136/bmjgh-2023-012466), 2023-07-12
Supplement: bmjgh-2023-012466supp001.pdf [file bmjgh-2023-012466supp001.pdf]

## Appendix S1. Epidemiological methods

The subsequent pages provide relevant details and methods regarding the underlying epidemiological model and vaccine delivery scenarios from Clark et al., 2023.[1]

### S1.1. Tuberculosis natural history structure

The core natural history model is specified in Figure A. Those with no previous exposure or infection with *Mtb* [Uninfected-Naive ( $U_N$ )] could become infected at rate  $\lambda_j$  and progress to an Infection-Fast ( $I_F$ ) class following initial infection. From Infection-Fast, three possible pathways were possible: (i) Fast progression to Subclinical Disease ( $D_S$ ), where individuals are infectious with a reduced infectiousness compared to clinical tuberculosis, but display no symptoms of tuberculosis disease;[2] (ii) self-clearance to Uninfected-Cleared ( $U_C$ ), where individuals are no longer infected with *Mtb* and therefore are not at risk of progression to tuberculosis disease without reinfection;[3] or (iii) continue to remain latently infected with a risk of reactivation and progression to disease, albeit at a lower rate than Infection-Fast, by transitioning to the Infection-Slow ( $I_S$ ) class. Those in the Infection-Slow class could self-clear to the Uninfected-Cleared class, be reinfected and return to the Infection-Fast class or reactivate their infection and progress to Subclinical Disease.

Once in the Subclinical Disease class, individuals could naturally cure (without treatment) to the Resolved ( $R$ ) class, or progress to Clinical Disease ( $D_C$ ), where individuals are infectious and display symptoms of tuberculosis disease. Treatment initiation from Clinical Disease to On-Treatment ( $T$ ) began in 1960 and increased following a sigmoid curve to 2019, with average treatment duration assumed to be six months.[4, 5] Treatment completions transitioned to the Resolved class and treatment non-completions returned to Clinical Disease. Deaths occurring on-treatment and in clinical disease counted toward the total number of tuberculosis deaths during the year. Those with clinical disease could also naturally cure to the resolved class. Individuals in the Resolved class could be reinfected or relapse to Subclinical. We assumed that the infection and resolved classes are partially protected against reinfection.[6, 7] In those who have self-cleared, we assumed the level of protection against reinfection is half of the protection against reinfection for the infection and resolved classes. Age was modelled in single years from ages 0 to 79 and aggregated into two categories for ages 80 to 89, and ages 90 to 99. Births and ageing occurred at the beginning of each year.

### S1.2. HIV and ART structure description

To account for the influences of human immunodeficiency virus (HIV) and antiretroviral therapy (ART) on the risk of infection with *Mtb* and progression to tuberculosis disease,[6, 8] we implemented an HIV structure (shown in Figure B) composed of 3 compartments: HIV uninfected [ $HIV_0$ ], people living with HIV (PLHIV) not on ART [ $HIV_1$ ], and PLHIV on ART [ $ART$ ]. HIV uninfected individuals were diagnosed with HIV and moved from the  $HIV_0$  compartment to the  $HIV_1$  compartment with rate  $\lambda_H$ . Within the  $HIV_1$  compartment, there is a higher risk of tuberculosis progression and an increased tuberculosis mortality rate compared to the  $HIV_0$  compartment. PLHIV are initiated on treatment with ART from  $HIV_1$  following a sigmoid trend.

The increases in tuberculosis mortality rate and tuberculosis progression are reduced while in ART compared to HIV1, but still higher than in HIV0. ART also reduces the HIV mortality rate.

The separate stratum was included to dynamically model the tuberculosis-HIV co-epidemic if the proportion of tuberculosis cases among people living with HIV (PLHIV) was greater than or equal to 15%, and if the HIV prevalence in the country was greater than 1%. Countries incorporating the additional HIV structure are listed in Table C.

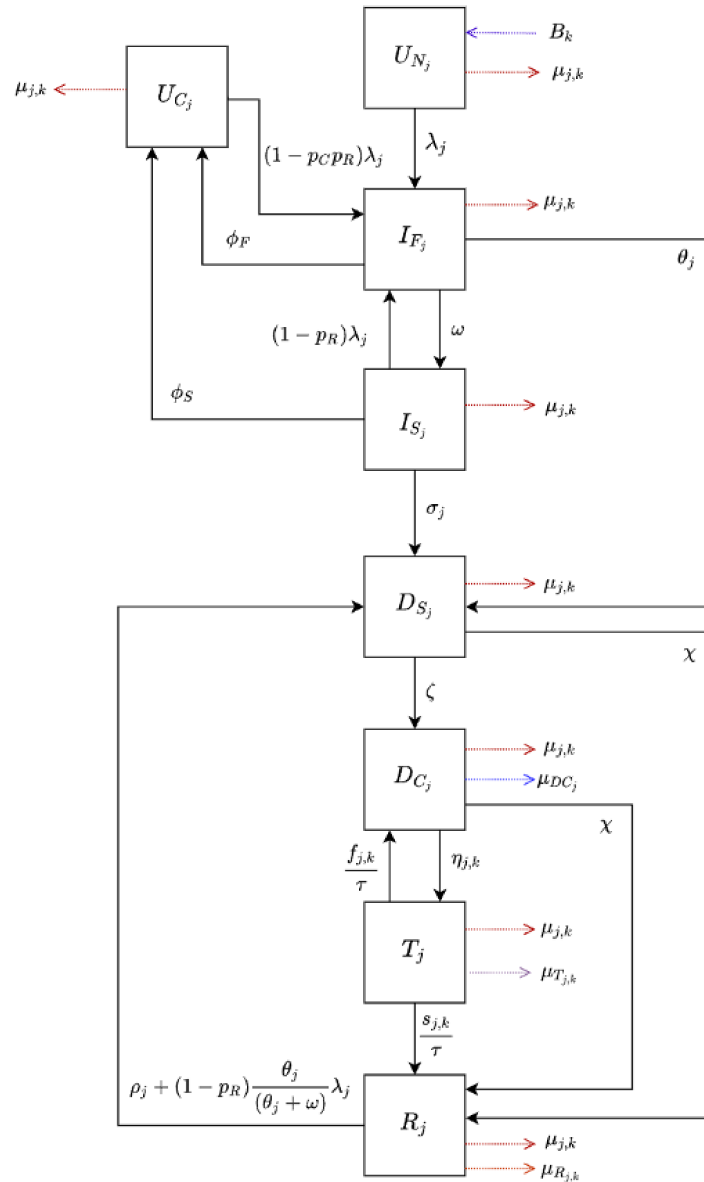

**Figure A. Tuberculosis natural history model**

Abbreviations:  $D_C$  = Clinical Disease;  $D_S$  = Subclinical Disease;  $I_F$  = Infection-Fast;  $I_S$  = Infection-Slow;  $R$  = Resolved;  $T$  = On-Treatment;  $U_C$  = Uninfected-Cleared;  $U_N$  = Uninfected-Naïve.

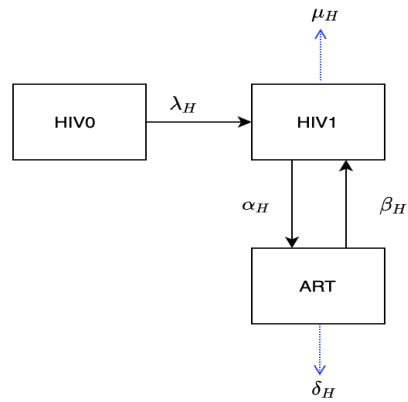

**Figure B. HIV and ART structure.**

Abbreviations: ART = People living with HIV on ART; HIV0 = HIV uninfected; HIV1 = People living with HIV not on ART.

**Table C. Countries incorporating the HIV structure with their corresponding HIV prevalence and proportion of tuberculosis cases among PLHIV.**

| Country                  | HIV Prevalence (%) | Proportion of tuberculosis cases among PLHIV (%) |
|--------------------------|--------------------|--------------------------------------------------|
| Botswana                 | 16.5               | 48.6                                             |
| Central African Republic | 2.1                | 25.4                                             |
| Côte d'Ivoire            | 1.7                | 17.5                                             |
| Cameroon                 | 2.0                | 26.8                                             |
| Gabon                    | 2.3                | 32.8                                             |
| Ghana                    | 1.1                | 20.8                                             |
| The Gambia               | 1.2                | 17.7                                             |
| Guinea-Bissau            | 2.1                | 31.3                                             |
| Equatorial Guinea        | 4.8                | 26.5                                             |
| Guyana                   | 1.1                | 19.0                                             |
| Kenya                    | 2.9                | 26.2                                             |
| Lesotho                  | 16.0               | 61.6                                             |
| Mozambique               | 7.2                | 33.8                                             |
| Malawi                   | 5.9                | 46.6                                             |
| Namibia                  | 8.4                | 32.5                                             |
| Rwanda                   | 1.8                | 21.1                                             |
| Eswatini                 | 17.4               | 60.1                                             |
| Togo                     | 1.5                | 16.2                                             |
| Tanzania                 | 2.9                | 23.6                                             |
| Uganda                   | 3.4                | 39.0                                             |
| South Africa             | 12.8               | 58.0                                             |
| Zambia                   | 6.7                | 46.2                                             |
| Zimbabwe                 | 9.6                | 59.8                                             |

**S1.3. Access to care structure**

The access to care dimension is incorporated to allow for the negative correlation between tuberculosis burden and health care access to prevent the overestimation of vaccine impact, as well as to facilitate analyses of equity implications of vaccine introduction. The access to care dimension contains 2 classes: high-access-to-care, representing the top income 3 quintiles (60% of the population) and low-access-to-care, representing the bottom 2 income quintiles (40% of the population). We assumed that there was no transition between the high- and low-access-to-care classes, as well as assuming random mixing between the high-access-to-care and low-access-to-care classes.

To constrain relative burden between access-to-care classes, we calibrated the tuberculosis prevalence ratio in the high-access-to-care class to the low-access-to-care class in 2019. The calibration target, 0.674, was calculated as a weighted average from eleven studies, with lower and upper bounds (0.575–0.801) representing the 25th and 75th percentiles of the datasets (Table D).[9-19]

**Table D.** TB prevalence study data.

| Source | Country      | Prevalence rate ratio of upper 60% vs. lower 40% of population by socioeconomic status | Weight |
|--------|--------------|----------------------------------------------------------------------------------------|--------|
| [11]   | Bangladesh   | 0.394                                                                                  | 1      |
| [14]   | India        | 0.386                                                                                  | 1      |
| [15]   | India        | 0.467                                                                                  | 1      |
| [17]   | Kenya        | 0.588                                                                                  | 1      |
| [16]   | Malawi       | 0.867                                                                                  | 1      |
| [16]   | Mongolia     | 0.716                                                                                  | 1      |
| [16]   | Myanmar      | 0.807                                                                                  | 1      |
| [16]   | Philippines  | 0.755                                                                                  | 0.5    |
| [17]   | Philippines  | 0.608                                                                                  | 0.5    |
| [13]   | Rwanda       | 1.081                                                                                  | 1      |
| [16]   | Rwanda       | 0.774                                                                                  | 1      |
| [9]    | South Africa | 0.486                                                                                  | 1      |
| [18]   | South Africa | 0.896                                                                                  | 1      |
| [16]   | Tanzania     | 0.648                                                                                  | 1      |
| [10]   | Vietnam      | 0.701                                                                                  | 1      |
| [19]   | Vietnam      | 0.799                                                                                  | 1      |
| [16]   | Vietnam      | 0.672                                                                                  | 1      |
| [12]   | Zambia       | 0.534                                                                                  | 0.7    |
| [16]   | Zambia       | 1.312                                                                                  | 0.7    |
| [18]   | Zambia       | 0.728                                                                                  | 0.7    |

To incorporate access to care into our model, we assume that the differences in tuberculosis burden between classes are due to differences in the force of infection, the rate of care-seeking (i.e., tuberculosis treatment initiation), and the rate of tuberculosis progression. We assume relative to the low-access-to-care stratum, the high-access-to-care stratum has a reduced force of infection per contact, an increased rate of treatment initiation, and a reduced rate of tuberculosis progression. Differential burden was implemented by introducing a new parameter  $p_E$ , such that  $p_E \in [0, 1]$  for the high-access-to-care stratum and  $p_E = 0$  for the low-access-to-care stratum. This parameter was included within the model natural history structure as described in Table E. This new parameter was fitted during calibration.

**Table E.** Implementing the access-to-care parameter

|  | Access-to-Care |
|--|----------------|
|  |                |

|                                         |                                                                                                                                 |
|-----------------------------------------|---------------------------------------------------------------------------------------------------------------------------------|
| <b>Force of infection</b>               | $p_T \times \sum_{y=1}^{n_{ygroups}} (1 - p_E) \times C[m, y] \times \left( \frac{(1 - ep)(TD_{C_y} + rTD_{S_y})}{N_y} \right)$ |
| <b>Treatment Initiation Rate</b>        | $\frac{\eta_{j,k}}{(1 - p_E)}$                                                                                                  |
| <b>Rate of Tuberculosis Progression</b> | $(1 - p_E) \times \theta_j$<br>$(1 - p_E) \times \sigma_j$<br>$(1 - p_E) \times \rho_j$                                         |

#### S1.4. Calibration methodology

The model was fitted to epidemiologic calibration targets using history matching with emulation, implemented using the hmer R package.[20, 21] If countries were unable to find at least 1000 fully fitted parameter sets using this method, they were subsequently assessed using an Approximate Bayesian Computation using Markov Chain Monte Carlo method (ABC-MCMC). ABC-MCMC was conducted using the easyABC package in R, modified by Sebastian Funk, Gwenan Knight, and the Tuberculosis Modelling group at LSHTM for adaptive sampling and to accept seeded parameter values.[20, 22] We used parameter sets with the maximum number of targets fitted using history matching with emulation as a starting seed, with the ABC-MCMC algorithm continuously adapting using the last 1000 points and the noise factor set to 0.0001.

Analysis was performed on 105 countries from the 135 total low- and middle-income countries identified based on 2019 World Bank Income groups. There were 20 countries excluded from the initial calibration attempt due to missing crucial data required to attempt calibration, and 10 countries which were unable to be calibrated (could not find a parameter set that matched all targets using both history matching with emulation as well as ABC-MCMC). Reasons for exclusion from the final list of calibrated countries are provided in Table F.

**Table F. Reasons for exclusion from the final list of calibrated countries.**

| Country                               | Reason for Exclusion                                                                          |
|---------------------------------------|-----------------------------------------------------------------------------------------------|
| Algeria                               | Did not calibrate                                                                             |
| American Samoa                        | Missing multiple critical epidemiological data for calibration, no contact matrices available |
| Belize                                | No case notification or incidence data for children                                           |
| Bosnia and Herzegovina                | Did not calibrate                                                                             |
| Cabo Verde                            | Did not calibrate                                                                             |
| Comoros                               | No case notification data                                                                     |
| Democratic Republic of the Congo      | No case notification data by age                                                              |
| Republic of the Congo                 | No population estimates                                                                       |
| Democratic People's Republic of Korea | Missing multiple critical epidemiological data for calibration                                |
| Djibouti                              | No case notification data by age                                                              |
| Dominica                              | Missing multiple critical epidemiological data for calibration, no contact matrices available |
| Guinea-Bissau                         | Did not calibrate                                                                             |
| Guyana                                | Did not calibrate                                                                             |
| Federated States of Micronesia        | Missing multiple critical epidemiological data for calibration, no contact matrices available |
| Grenada                               | Missing multiple critical epidemiological data for calibration, no contact matrices available |
| Haiti                                 | Missing 2020 contact matrix                                                                   |
| Jamaica                               | Did not calibrate                                                                             |
| Kiribati                              | Missing 2020 contact matrix                                                                   |
| Kosovo                                | Missing multiple critical epidemiological data for calibration                                |
| Lebanon                               | Missing 2020 contact matrix                                                                   |
| Marshall Islands                      | Missing multiple critical epidemiological data for calibration, no contact matrices available |
| North Macedonia                       | Did not calibrate                                                                             |



|                                |                                                                |
|--------------------------------|----------------------------------------------------------------|
| Samoa                          | No case notification or incidence data for children            |
| Somalia                        | No contact matrices available                                  |
| St. Lucia                      | No case notification or incidence data for children            |
| St. Vincent and the Grenadines | Did not calibrate                                              |
| Tonga                          | Did not calibrate                                              |
| Turkmenistan                   | Did not calibrate                                              |
| Tuvalu                         | No contact matrices available                                  |
| West Bank and Gaza             | Missing multiple critical epidemiological data for calibration |

### S1.5. Vaccine profile

The vaccine profile for an adult/adolescent vaccine and infant vaccine were based on the WHO Preferred Product Characteristics for New Tuberculosis vaccines,[23] and are outlined in Table G below.

**Table G. WHO Preferred Product Characteristics for New Tuberculosis Vaccines.**

| Vaccine            | Host infection status at time of vaccination required for efficacy | Effect type           | Vaccine efficacy | Duration of protection |
|--------------------|--------------------------------------------------------------------|-----------------------|------------------|------------------------|
| Adolescent / Adult | Pre- and post-infection                                            | Prevention of disease | 50%              | Lifelong               |
|                    |                                                                    |                       |                  | 10 years               |
| Infant             | Pre-infection                                                      | Prevention of disease | 80%              | Lifelong               |
|                    |                                                                    |                       |                  | 10 years               |

Vaccine efficacy was assumed to be the same in both PLHIV and HIV-naïve recipients in countries incorporating the HIV structure, and in both younger age groups and older adults. The vaccine was assumed to have the same impact on preventing drug-susceptible and drug-resistant tuberculosis as specified in the WHO PPCs.[23] As we were modelling a prevention of disease vaccine, there was no direct impact on *Mtb* transmission or the force of infection.

We assumed duration of protection was 10 years on average, in addition to a sensitivity analysis with lifelong duration of protection. The shape of waning immunity was modelled as an exponential distribution, based on similar shapes for waning vaccine immunity of BCG[24] and other vaccines.[25, 26]

### S1.6. Vaccine delivery scenarios

The infant vaccine was implemented in two scenarios, and, separately, the adolescent/adult vaccine was implemented in three scenarios. The *Basecase* and *Accelerated Scale-up* scenarios included routine single-dose neonatal vaccination for the infant vaccine (85% coverage), and routine single-dose vaccination of 9-year-olds (80% coverage) with a one-time vaccination campaign for ages ten and older (70% coverage) for the adolescent/adult vaccine. The *Routine Only* scenario (adolescent/adult vaccine only) was introduced through routine 9-year-old vaccination only (i.e., no campaign). Specifics of the infant and adolescent/adult vaccine scenarios are provided in Table H.

**Table H. Vaccine scenarios for the infant and adolescent/adult vaccines.**

| Characteristics                       | Infant Vaccine Scenarios           |                              | Adolescent/Adult Vaccine Scenarios                                                       |                                                                                     |                                    |
|---------------------------------------|------------------------------------|------------------------------|------------------------------------------------------------------------------------------|-------------------------------------------------------------------------------------|------------------------------------|
|                                       | <i>Basecase</i>                    | <i>Accelerated Scale-up</i>  | <i>Basecase</i>                                                                          | <i>Accelerated Scale-up</i>                                                         | <i>Routine Only</i>                |
| <b>Ages Targeted</b>                  | <i>Neonatal: Routine</i>           | <i>Neonatal: Routine</i>     | <i>Age 9: Routine</i><br><br><i>Ages 10+: One-time vaccination campaign over 5 years</i> | <i>Age 9: Routine</i><br><br><i>Ages 10+: One-time vaccination campaign in 2025</i> | <i>Age 9: Routine</i>              |
| <b>Introduction Year</b>              | Country-specific                   | 2025                         | Country-specific                                                                         | 2025                                                                                | Country-specific                   |
| <b>Vaccine Rollout Trend</b>          | 5-year linear scale-up to coverage | Instant scale-up to coverage | 5-year linear scale-up to coverage                                                       | Instant scale-up to coverage                                                        | 5-year linear scale-up to coverage |
| <b>Target Coverage (Low/Med/High)</b> | 75% / 85% / 95%                    |                              | Age 9: 70% / 80% / 90%<br>Ages 10+: 50% / 70% / 90%                                      |                                                                                     |                                    |

### S1.7. Country-specific introduction years

In the *Basecase* and *Routine Only* scenarios, vaccines were introduced in country-specific introduction years between 2028 and 2047. The year 2028 was selected as the earliest country-specific introduction year to align with the anticipated completion and availability of results from TB vaccine candidate trials based on expert consultation and analysis. Country-specific introduction years were calculated for all 135 LMICs based on the 2019 World Bank Income groups. To calculate the specific year of introduction, countries were divided into two general categories: those procuring with support from Gavi, the Vaccine Alliance, and those self-procuring. Determination of country status was based on eligibility information posted on Gavi's website.[27] Countries transitioning from Gavi support are able to benefit from Gavi pricing and incremental financing for a period of 5–10 years. For countries that have already initiated the period of transition by 2019, this window will have largely ended by the time of tuberculosis vaccine availability through Gavi. As such, these countries were categorised as self-procuring countries. Countries that have not yet commenced transition, including India and Nigeria, were categorised as Gavi supported countries, given the long grace period post-commencement of transition. For more information, please see Gavi, <https://www.gavi.org/types-support/sustainability/transition> (retrieved December 1, 2020).

Through a consultative process with experts from WHO, Gavi, PATH, PDVAC, CHAI, and industry partners, factors influencing likelihood of being an early or late adopter were identified for both Gavi and self-procuring countries. Identified factors include disease burden, immunization

capacity, and early adopter status. Country-specific registration timelines and commercial prioritization were also deemed important determinants of introduction timing for self-procuring countries.

*Additional factors for Gavi countries:* For countries procuring through Gavi, timelines for introduction are also influenced by Gavi processes. Prior to offering a new vaccine, Gavi requires that products be licensed, included in Gavi's Vaccine Investment Strategy, reviewed by SAGE, recommended in a WHO position paper, WHO prequalified, and approved for procurement by Gavi (Table I). In addition, time for country application processing, contracting, and delivery must be factored. Through consultations, it was determined that a baseline time of roughly two years post licensure would be needed for Gavi processes prior to first country introduction, assuming several steps advance in parallel.

**Table I. Timelines for Gavi processes post licensure.**

| Activities post licensure               | Cumulative additional time (years) |             |             |
|-----------------------------------------|------------------------------------|-------------|-------------|
|                                         | Low End                            | High End    | Average     |
| WHO PQ                                  | 0.25                               | 1.00        | 0.63        |
| SAGE Policy Review & WHO Position Paper | 0.25                               | 0.50        | 0.38        |
| Gavi Decision                           | 0.25                               | 0.50        | 0.38        |
| National review & Country applications  | 0.25                               | 0.75        | 0.50        |
| Contracting & delivery                  | 0.25                               | 0.50        | 0.38        |
| <b>Years</b>                            | <b>1.25</b>                        | <b>3.25</b> | <b>2.25</b> |

*Weight of criteria, indicators, and scoring:* Differential weight was assigned to criteria based on their relative impact on the order of country adoption. This weight varied for self-procuring and Gavi countries (Table J).

**Table J. Weight of criteria influencing order of country adoption.**

| Criteria                    | Self-procuring countries | Gavi countries |
|-----------------------------|--------------------------|----------------|
| Disease burden              | 30%                      | 45%            |
| Immunization capacity       | 15%                      | 30%            |
| Early adopter/leader        | 15%                      | 25%            |
| Lack of regulatory barriers | 15%                      | NA             |
| Commercial prioritization   | 25%                      | NA             |

The following indicators were used to measure each of the variables identified in Table K.

**Table K. Indicators of criteria influencing order of country adoption.**

| Criteria                                      | Indicator                                                                                                                                                                               |
|-----------------------------------------------|-----------------------------------------------------------------------------------------------------------------------------------------------------------------------------------------|
| <b>Disease burden</b>                         | Tuberculosis incidence                                                                                                                                                                  |
| <b>Immunization capacity</b>                  | Proportion receiving 3 doses of DPT3 among infants 1 years of age (The percent of infants receiving 3 doses DPT3 is commonly used as a proxy for assessing immunization infrastructure) |
| <b>Lack of regulatory barriers</b>            | Signatories to WHO PQ or SRA collaborative registration scheme<br>Lack of requirements for additional local clinical trial data                                                         |
| <b>Early adopter/leader</b>                   | Time to policy adoption of universal Xpert MTB/RIF screening for presumed tuberculosis cases<br>Time to adoption of HPV                                                                 |
| <b>Commercial prioritization</b>              |                                                                                                                                                                                         |
| <i>Ability to finance vaccines</i>            | GDP per capita                                                                                                                                                                          |
| <i>Political will to address tuberculosis</i> | Spending per tuberculosis case                                                                                                                                                          |
| <i>Market potential</i>                       | Population                                                                                                                                                                              |

To standardize across these varied metrics, a point value ranging from 1–5 per criteria was assigned, with a score of 1 correlating with an earlier adopter and score of 5 correlating with a later adopter.

*Continuous variables* such as disease burden or population were divided into quintiles. Those in the highest quintile were assigned a score of 1, those in the second highest quintile received a score of 2, and so forth. *Categorical variables* such as registration or early adopter status were scored based on whether countries met fixed criteria. For instance, countries that are signatories of WHO PQ or SRA collaborative registration schemes were assigned a score of 1. Those that are not signatories and have requirements for additional clinical trial data in local populations received a score of 5.

Scores were then weighted as reflected in Table J and aggregated into a composite score to determine countries' relative position in the queue of introductions.

Assumptions for the pace of introduction—i.e., how many countries per year would introduce the product and what the scale up curve might look like— was informed with data from pneumococcal vaccine (PCV) scale-up.[28] The percent of countries adopting each year (year 1 to year 12) for PCV was calculated. These annual percentages were then applied to tuberculosis vaccine scale up (based on a total n=135 countries: 78 self-procuring countries and 57 Gavi countries). The first year of tuberculosis vaccine scale up was estimated to be 2028, with Gavi countries following a similar scale up trajectory but delayed by two years due to required Gavi lead time for processing new vaccines (Table I). Because PCV data is only available for 12 years, data was extrapolated for years 13 to 20 of tuberculosis vaccine roll out at a steady state. Country introduction timelines were adjusted—where applicable—to group countries with the same composite score in the same year of adoption. The cumulative number of countries introducing the vaccine by year is shown in Figure L.

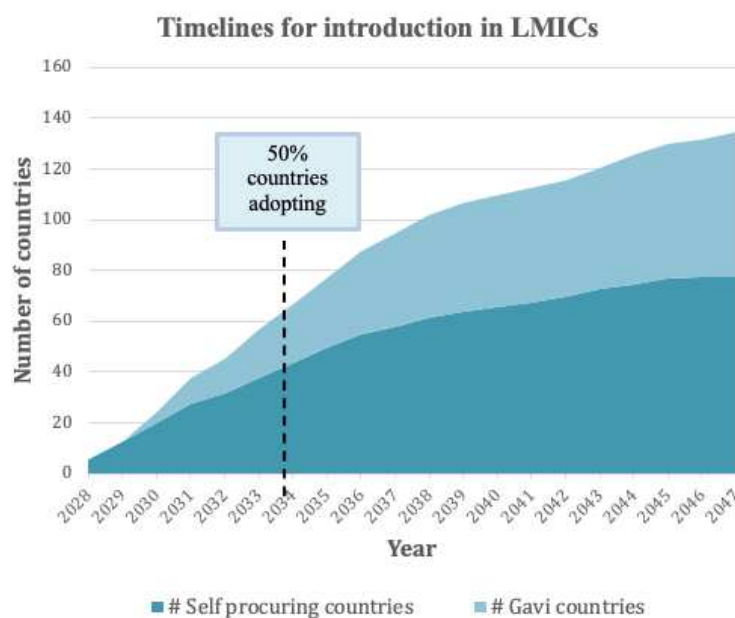

**Figure L.** Assumed cumulative number of countries introducing a novel vaccine per year.

### **S1.8. Vaccine coverage targets.**

For each vaccine implementation scenario, low, medium, and high coverage targets for 5 years post-introduction were evaluated. The medium coverage target for the routine infant vaccination was 85%, based on the 2019 DTP3 (diphtheria, tetanus toxoid, and pertussis) average coverage level according to the WHO and UNICEF estimates of national immunisation coverage, with 10% uncertainty (low coverage = 75%, high coverage = 95%).<sup>[28]</sup> Routine adolescent vaccination assumed a medium coverage target of 80% aligning with HPV coverage in South Africa combined with aggregated secondary school enrolment in China and India as assumed in Harris 2020,<sup>[29]</sup> also with 10% uncertainty targets (low coverage = 70%, high coverage = 90%). The medium coverage target for the adolescent/adult campaign was 70% aligning with the lower bound of the MenAfriVac campaigns in sub-Saharan Africa as assumed in Harris 2020,<sup>[29]</sup> with a wider uncertainty of 20% (low coverage = 50%, high coverage = 90%).

In the *Accelerated Scale-up* implementation, the 5-year coverage targets were achieved instantly in year 1, while in the *Basecase* and *Routine Only* implementations, the scale-up to coverage occurred linearly over 5 years.

### **S1.9. Calibrated *No-New-Vaccine* baseline trends.**

Here we show the tuberculosis incidence rates plotted from 2000–2050 for the selected grouping for reporting model outcomes. In Figure M, looking by WHO region, we see the incidence rates are highest in AFR and SEAR, and lowest in AMR and EUR. In Figure N, we show the incidence rate trends by income group. Both incidence and mortality rates follow a trend with the highest estimated medians in lower-middle-income countries, followed by low-income countries and high-income countries, which aligns with the expectation of burden within each region. In Figure O, we compare incidence rates between countries included on the WHO high TB burden list and all other countries modelled, and as expected, higher values are predicted for countries on the high TB burden list.

**Figure M. Tuberculosis incidence rates for the *No-New-Vaccine* baseline by WHO region.**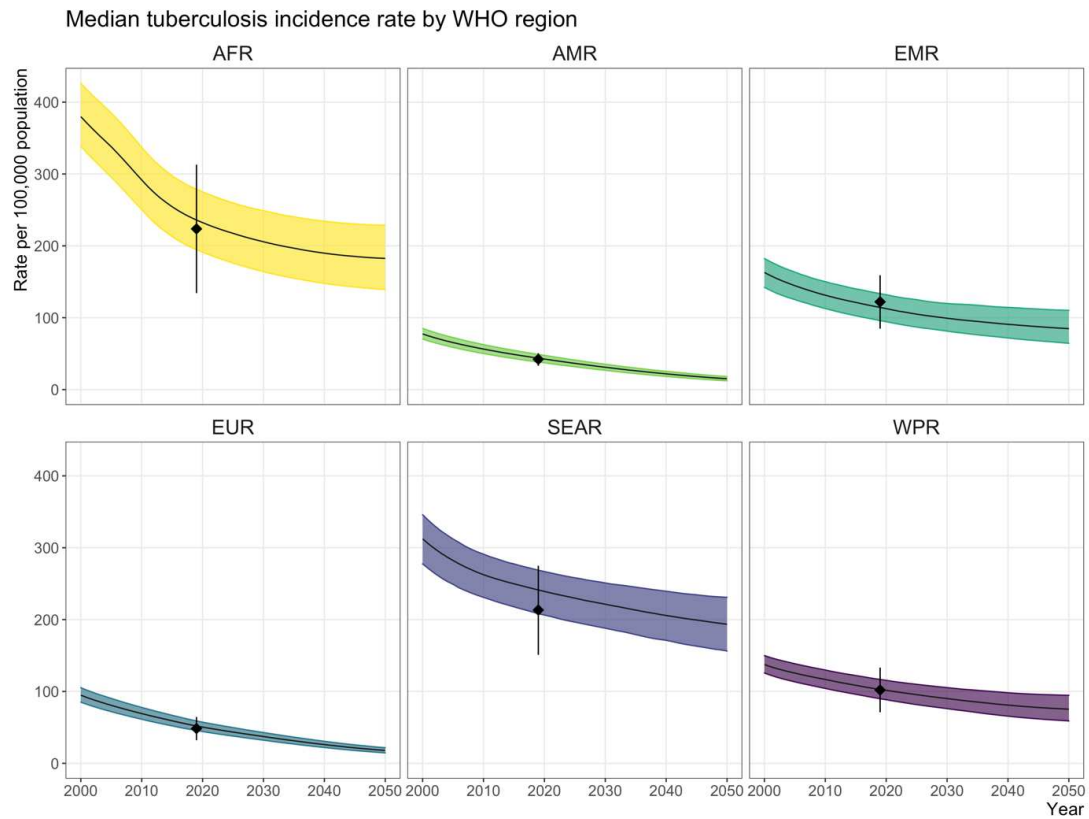

Note: The black diamond is the WHO median estimate of the incidence in 2019 for the 105 modelled LMICs by WHO region with 95% uncertainty range. The black line is the model estimated median incidence rate, with shaded 95% uncertainty ranges. AFR = WHO African Region, AMR = WHO Region of the Americas, EMR = WHO Eastern Mediterranean Region, EUR = WHO European Region, SEAR = WHO South-East Asian Region, WPR = WHO Western Pacific Region.



**Figure N. Tuberculosis incidence rates for the *No-New-Vaccine* baseline by income group.**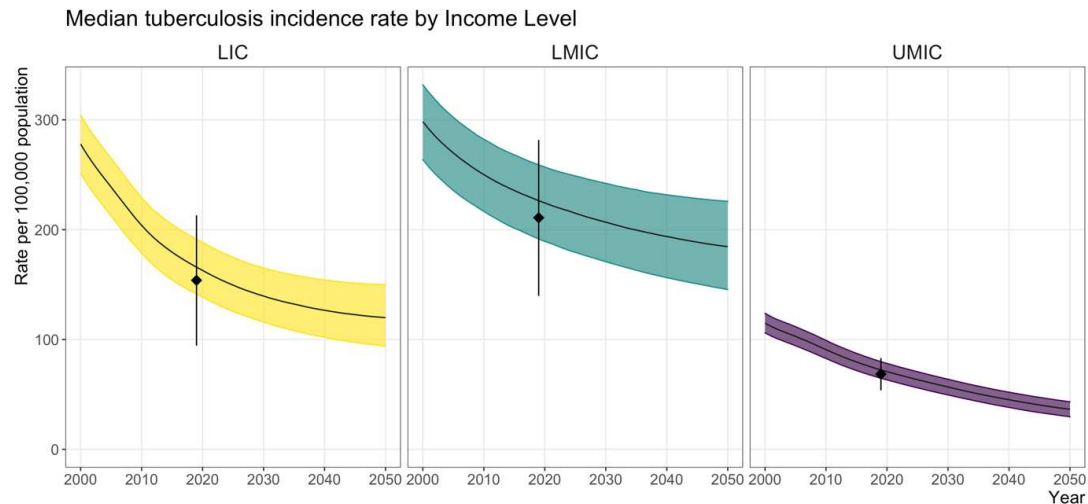

Note: The black diamond is the WHO median estimate of the incidence rate in 2019 for the 105 modelled LMICs by income group with 95% uncertainty range. The black line is the model estimated median incidence rate, with shaded 95% uncertainty ranges. LIC = low-income countries, LMIC = lower middle-income countries, UMIC = upper middle-income countries.

**Figure O. Tuberculosis incidence rates for the *No-New-Vaccine* baseline for the countries included on the WHO high-TB-burden list and for all other countries modelled.**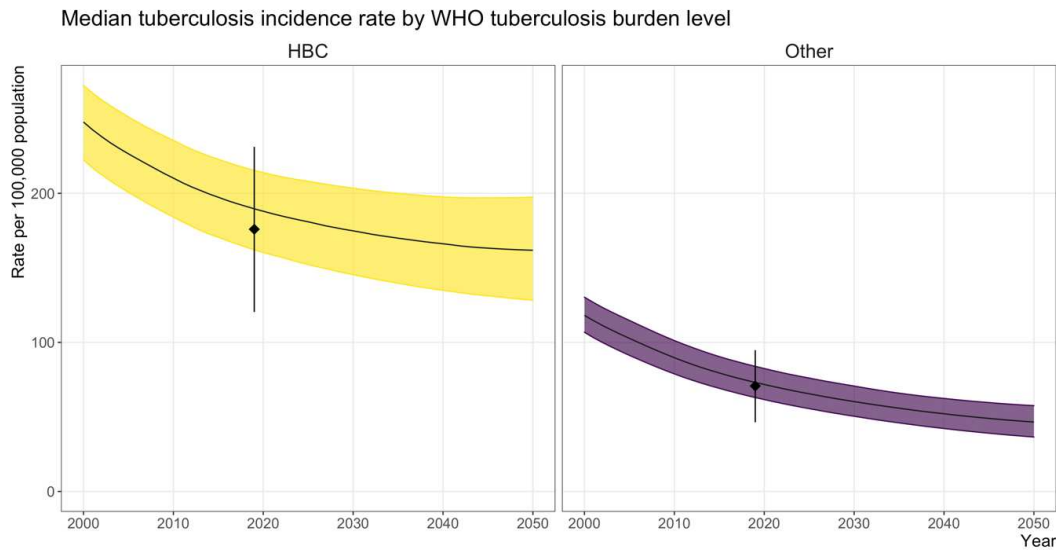

Note: The black diamond is the WHO median estimate of the incidence rate in 2019 for the 105 modelled LMICs by burden level with 95% uncertainty range. The black line is the model estimated median incidence rate, with shaded 95% uncertainty ranges. HBC = high burden countries.

### **S1.10. Model Parameters and Data Sources.**

Parameters used in the natural history model structure and the HIV and ART model structure are provided in Table P below, along with their definitions, sources, and information on whether the parameter is fixed or varied (as well as whether they are varied by age or time) during calibration. The parameter ranges provided for the tuberculosis natural history parameters are priors fitted during calibration in a Bayesian analysis. We assume that all values within the prior range are equally likely. The prior ranges were pre-specified based on literature review and were reviewed as new data became available.

**Table P. Demographic and tuberculosis natural history parameters and definitions.**

| Description                                                   | Units               | Symbol       | Prior                                                                            | Fixed or Varying During Calibration | Age Varying                                                | Time Varying                    | Source            |
|---------------------------------------------------------------|---------------------|--------------|----------------------------------------------------------------------------------|-------------------------------------|------------------------------------------------------------|---------------------------------|-------------------|
| <i>Births and deaths (excluding on-treatment mortality)</i>   |                     |              |                                                                                  |                                     |                                                            |                                 |                   |
| Birth rate                                                    | Per year            | $B_k$        | United Nations World Population Prospects population estimates and projections   | Fixed                               | No                                                         | Yes                             | [30]              |
| Background mortality rate                                     | Per year            | $\mu_{j,k}$  | Calculated in the model from United Nations population estimates and projections | Fixed                               | Yes, age specific mortality rates from demographic dataset | Yes                             | [30]              |
| Mortality rate for clinical tuberculosis disease              | Per person per year | $\mu_{DC_j}$ | (0–0.178)                                                                        | Varying                             | Yes, value for children is greater than value for adults   | No                              | [31]              |
| Mortality rate post-tuberculosis disease                      | Per person per year | $\mu_{R_j}$  | $0.22\mu_{j,k}$                                                                  | Fixed relationship                  | Yes, because $\mu_{j,k}$ varies                            | Yes, because $\mu_{j,k}$ varies | [32]              |
| <i>Natural history</i>                                        |                     |              |                                                                                  |                                     |                                                            |                                 |                   |
| Force of infection                                            | Per year            | $\lambda_j$  | Fitted                                                                           | Fixed equation                      | Yes, age specific contact rates <sup>9</sup>               | No                              | <i>Calculated</i> |
| Probability of transmission per infectious contact            | -                   | $p_T$        | (0–0.0068)                                                                       | Varying                             | No                                                         | No                              | <i>Assumed</i>    |
| Fraction of total tuberculosis disease that is extrapulmonary | -                   | $ep$         | Country-specific average of previous 3 years                                     | Fixed                               | No                                                         | No                              | [33, 34]          |

|                                                                 |                     |            |                    |         |                                                       |    |                |
|-----------------------------------------------------------------|---------------------|------------|--------------------|---------|-------------------------------------------------------|----|----------------|
| Infectiousness of subclinical relative to clinical tuberculosis | -                   | $r$        | 0-80               | Fixed   | No                                                    | No | [35]           |
| Rate of self-clearance from $I_F$ to $U_C$                      | Per person per year | $\phi_F$   | 0-00000140         | Fixed   | No                                                    | No | [3]            |
| Rate of self-clearance from $I_S$ to $U_C$                      | Per person per year | $\phi_S$   | (0-0254-0-0467)    | Varying | No                                                    | No | [3]            |
| Rate of fast progression to disease, by age                     | Per person per year | $\theta_j$ | (0-0696-0-111)     | Varying | Yes, value for children is less than value for adults | No | [3]            |
| Rate from $I_F$ to $I_S$                                        | Per person per year | $\omega$   | 0-5                | Fixed   | No                                                    | No | <i>Defined</i> |
| Rate of reactivation from $I_S$ , by age                        | Per person per year | $\sigma_j$ | (0-000135-0-00113) | Varying | Yes, value for children is less than value for adults | No | [3]            |
| Rate of progression from $D_S$ to $D_C$                         | Per person per year | $\zeta$    | (0-1)              | Varying | No                                                    | No | <i>Assumed</i> |
| Rate of natural cure from $D_C$ and $D_S$                       | Per person per year | $\chi$     | (0-1-0-25)         | Varying | No                                                    | No | [36, 37]       |
| Rate of relapse from R, by age                                  | Per person per year | $\rho_j$   | (0-0001-0-07)      | Varying | Yes, value for children is less than value for adults | No | [38-40]        |
| <b><i>Treatment outcome parameters</i></b>                      |                     |            |                    |         |                                                       |    |                |
| Treatment duration                                              | Number of years     | $\tau$     | 0-5                | Fixed   | No                                                    | No | [4, 5]         |

|                                                                           |                     |                                     |                  |                |                                                       |     |                     |
|---------------------------------------------------------------------------|---------------------|-------------------------------------|------------------|----------------|-------------------------------------------------------|-----|---------------------|
| Rate of on-treatment mortality                                            | Per person per year | $\mu_{T_j} = \frac{\kappa_j}{\tau}$ | Country-specific | Varying        | Yes, value for children greater than value for adults | Yes | [41]                |
| Rate of treatment completion                                              | Per person per year | $\frac{s_j}{\tau}$                  | Country-specific | Fixed equation | Yes, indirectly scaled by $s_{Age}$                   | Yes | [41]                |
| Rate of treatment non-completion                                          | Per person per year | $\frac{f_j}{\tau}$                  | Country-specific | Fixed equation | Yes, indirectly scaled by $s_{Age}$                   | Yes | [41]                |
| <b>Protection parameters</b>                                              |                     |                                     |                  |                |                                                       |     |                     |
| Protection from reinfection for $I_S, I_R, R$                             | -                   | $p_R$                               | (0.6–0.85)       | Varying        | No                                                    | No  | [7, 36, 37, 42, 43] |
| Relative protection from reinfection for self-clearance compared to $p_R$ | -                   | $p_C$                               | 0.50             | Fixed          | No                                                    | No  | <i>Assumed</i>      |
| SES parameter                                                             | -                   | $p_E$                               | (0–1)            | Varying        | No                                                    | No  | <i>Assumed</i>      |
| <b>HIV parameters</b>                                                     |                     |                                     |                  |                |                                                       |     |                     |
| HIV incidence rate fitting factor                                         | -                   | $\lambda_{Hfit}$                    | (0–300)          | Varying        | No                                                    | No  | <i>Fitted</i>       |
| Rate of ART initiation fitting factor                                     | -                   | $\alpha_{Hfit}$                     | (0–7000)         | Varying        | No                                                    | No  | <i>Fitted</i>       |
| Rate of ART discontinuation                                               | Per year            | $\beta_H$                           | 0.074            | Fixed          | No                                                    | No  | [44, 45]            |
| Mortality rate from HIV not on ART                                        | Per year            | $\mu_H$                             | 0.10             | Fixed          | No                                                    | No  | [46]                |

|                                                                   |          |                |                                                                  |         |    |    |                 |
|-------------------------------------------------------------------|----------|----------------|------------------------------------------------------------------|---------|----|----|-----------------|
| Mortality rate from HIV on ART                                    | Per year | $\delta_{II}$  | 0.026                                                            | Fixed   | No | No | [47]            |
| Relative increase in progression rate for HIV <sub>1</sub>        | -        | $\theta_{mul}$ | (3.94–14.45)                                                     | Varying | No | No | [48]            |
| Relative reduction in $\theta_{mul}$ for HIV and ART compartments | -        | $th1$          | HIV <sub>0</sub> = 0<br>HIV <sub>1</sub> = 1.00<br>ART = 0.35    | Fixed   | No | No | [8]             |
| Relative mortality rate adjustment for HIV and ART compartments   | -        | $m_{adj}$      | HIV <sub>0</sub> = 1.00<br>HIV <sub>1</sub> = 1.50<br>ART = 1.15 | Fixed   | No | No | [8, 31, 49, 50] |

**Appendix S2. Analysed low- and middle-income country list.**

| Country                  | WHO Region | Income level <sup>a</sup> | Gavi status | High-TB burden <sup>b</sup> | High-TB/HIV burden <sup>b</sup> | High-MDR/RR-TB burden <sup>b</sup> | Base-case vaccine introduction year |
|--------------------------|------------|---------------------------|-------------|-----------------------------|---------------------------------|------------------------------------|-------------------------------------|
| Afghanistan              | EMR        | LIC                       | Gavi        | No                          | No                              | No                                 | 2031                                |
| Angola                   | AFR        | LMIC                      | Gavi        | Yes                         | No                              | Yes                                | 2032                                |
| Albania                  | EUR        | UMIC                      | Non-Gavi    | No                          | No                              | No                                 | 2035                                |
| Argentina                | AMR        | UMIC                      | Non-Gavi    | No                          | No                              | No                                 | 2031                                |
| Armenia                  | EUR        | UMIC                      | Gavi        | No                          | No                              | No                                 | 2033                                |
| Azerbaijan               | EUR        | UMIC                      | Gavi        | No                          | No                              | Yes                                | 2028                                |
| Burundi                  | AFR        | LIC                       | Gavi        | No                          | No                              | No                                 | 2044                                |
| Benin                    | AFR        | LMIC                      | Gavi        | No                          | No                              | No                                 | 2037                                |
| Burkina Faso             | AFR        | LIC                       | Gavi        | No                          | No                              | No                                 | 2039                                |
| Bangladesh               | SEAR       | LMIC                      | Gavi        | Yes                         | No                              | Yes                                | 2035                                |
| Bulgaria                 | EUR        | UMIC                      | Non-Gavi    | No                          | No                              | No                                 | 2029                                |
| Belarus                  | EUR        | UMIC                      | Non-Gavi    | No                          | No                              | Yes                                | 2028                                |
| Bolivia                  | AMR        | LMIC                      | Gavi        | No                          | No                              | No                                 | 2037                                |
| Brazil                   | AMR        | UMIC                      | Non-Gavi    | Yes                         | Yes                             | No                                 | 2030                                |
| Bhutan                   | SEAR       | LMIC                      | Gavi        | No                          | No                              | No                                 | 2034                                |
| Botswana                 | AFR        | UMIC                      | Non-Gavi    | No                          | Yes                             | No                                 | 2028                                |
| Central African Republic | AFR        | LIC                       | Gavi        | Yes                         | Yes                             | No                                 | 2033                                |
| China                    | WPR        | UMIC                      | Non-Gavi    | Yes                         | No                              | Yes                                | 2029                                |
| Côte d'Ivoire            | AFR        | LMIC                      | Gavi        | No                          | No                              | No                                 | 2034                                |

|                    |      |      |          |     |     |     |      |
|--------------------|------|------|----------|-----|-----|-----|------|
| Cameroon           | AFR  | LMIC | Gavi     | No  | Yes | No  | 2031 |
| Colombia           | AMR  | UMIC | Non-Gavi | No  | No  | No  | 2030 |
| Costa Rica         | AMR  | UMIC | Non-Gavi | No  | No  | No  | 2033 |
| Cuba               | AMR  | UMIC | Gavi     | No  | No  | No  | 2035 |
| Dominican Republic | AMR  | UMIC | Non-Gavi | No  | No  | No  | 2031 |
| Ecuador            | AMR  | UMIC | Non-Gavi | No  | No  | No  | 2033 |
| Egypt              | EMR  | LMIC | Non-Gavi | No  | No  | No  | 2033 |
| Eritrea            | AFR  | LIC  | Gavi     | No  | No  | No  | 2047 |
| Ethiopia           | AFR  | LIC  | Gavi     | Yes | Yes | No  | 2030 |
| Fiji               | WPR  | UMIC | Non-Gavi | No  | No  | No  | 2031 |
| Gabon              | AFR  | UMIC | Non-Gavi | Yes | Yes | No  | 2038 |
| Georgia            | EUR  | UMIC | Gavi     | No  | No  | No  | 2029 |
| Ghana              | AFR  | LMIC | Gavi     | No  | No  | No  | 2040 |
| Guinea             | AFR  | LIC  | Gavi     | No  | Yes | No  | 2033 |
| Gambia             | AFR  | LIC  | Gavi     | No  | No  | No  | 2039 |
| Equatorial Guinea  | AFR  | UMIC | Non-Gavi | No  | No  | No  | 2042 |
| Guatemala          | AMR  | UMIC | Non-Gavi | No  | No  | No  | 2036 |
| Honduras           | AMR  | LMIC | Gavi     | No  | No  | No  | 2037 |
| Indonesia          | SEAR | UMIC | Gavi     | Yes | Yes | Yes | 2034 |
| India              | SEAR | LMIC | Gavi     | Yes | Yes | Yes | 2033 |
| Iran               | EMR  | UMIC | Non-Gavi | No  | No  | No  | 2031 |
| Iraq               | EMR  | UMIC | Non-Gavi | No  | No  | No  | 2033 |



|                                  |      |      |          |     |     |     |      |
|----------------------------------|------|------|----------|-----|-----|-----|------|
| Jordan                           | EMR  | UMIC | Non-Gavi | No  | No  | No  | 2037 |
| Kazakhstan                       | EUR  | UMIC | Non-Gavi | No  | No  | Yes | 2028 |
| Kenya                            | AFR  | LMIC | Gavi     | Yes | Yes | No  | 2032 |
| Kyrgyz Republic                  | EUR  | LMIC | Gavi     | No  | No  | Yes | 2044 |
| Cambodia                         | WPR  | LMIC | Gavi     | No  | No  | No  | 2036 |
| Lao People's Democratic Republic | WPR  | LMIC | Gavi     | No  | No  | No  | 2035 |
| Liberia                          | AFR  | LIC  | Gavi     | Yes | Yes | No  | 2037 |
| Libya                            | EMR  | UMIC | Non-Gavi | No  | No  | No  | 2035 |
| Sri Lanka                        | SEAR | LMIC | Gavi     | No  | No  | No  | 2028 |
| Lesotho                          | AFR  | LMIC | Gavi     | Yes | Yes | No  | 2039 |
| Morocco                          | EMR  | LMIC | Non-Gavi | No  | No  | No  | 2029 |
| Moldova, Republic of             | EUR  | LMIC | Gavi     | No  | No  | Yes | 2034 |
| Madagascar                       | AFR  | LIC  | Gavi     | No  | No  | No  | 2031 |
| Maldives                         | SEAR | UMIC | Non-Gavi | No  | No  | No  | 2034 |
| Mexico                           | AMR  | UMIC | Non-Gavi | No  | No  | No  | 2029 |
| Mali                             | AFR  | LIC  | Gavi     | No  | No  | No  | 2037 |
| Myanmar                          | SEAR | LMIC | Gavi     | Yes | Yes | Yes | 2031 |
| Montenegro                       | EUR  | UMIC | Non-Gavi | No  | No  | No  | 2044 |
| Mongolia                         | WPR  | LMIC | Gavi     | Yes | No  | Yes | 2032 |
| Mozambique                       | AFR  | LIC  | Gavi     | Yes | Yes | Yes | 2032 |
| Mauritania                       | AFR  | LMIC | Gavi     | No  | No  | No  | 2042 |
| Malawi                           | AFR  | LIC  | Gavi     | No  | Yes | No  | 2038 |

|                       |      |      |          |     |     |     |      |
|-----------------------|------|------|----------|-----|-----|-----|------|
| Malaysia              | WPR  | UMIC | Non-Gavi | No  | No  | No  | 2028 |
| Namibia               | AFR  | UMIC | Non-Gavi | Yes | Yes | No  | 2030 |
| Niger                 | AFR  | LIC  | Gavi     | No  | No  | No  | 2036 |
| Nigeria               | AFR  | LMIC | Gavi     | Yes | Yes | Yes | 2030 |
| Nicaragua             | AMR  | LMIC | Gavi     | No  | No  | No  | 2047 |
| Nepal                 | SEAR | LMIC | Gavi     | No  | No  | Yes | 2036 |
| Pakistan              | EMR  | LMIC | Gavi     | Yes | No  | Yes | 2031 |
| Peru                  | AMR  | UMIC | Non-Gavi | No  | No  | Yes | 2029 |
| Philippines           | WPR  | LMIC | Non-Gavi | Yes | Yes | Yes | 2030 |
| Papua New Guinea      | WPR  | LMIC | Gavi     | Yes | No  | Yes | 2032 |
| Paraguay              | AMR  | UMIC | Non-Gavi | No  | No  | No  | 2035 |
| Russian Federation    | EUR  | UMIC | Non-Gavi | No  | Yes | Yes | 2030 |
| Rwanda                | AFR  | LIC  | Gavi     | No  | No  | No  | 2045 |
| Sudan                 | EMR  | LIC  | Gavi     | No  | No  | No  | 2036 |
| Senegal               | AFR  | LMIC | Gavi     | No  | No  | No  | 2038 |
| Solomon Islands       | WPR  | LMIC | Gavi     | No  | No  | No  | 2047 |
| Sierra Leone          | AFR  | LIC  | Gavi     | Yes | No  | No  | 2037 |
| El Salvador           | AMR  | LMIC | Non-Gavi | No  | No  | No  | 2039 |
| Serbia                | EUR  | UMIC | Non-Gavi | No  | No  | No  | 2036 |
| South Sudan           | AFR  | LIC  | Gavi     | No  | No  | No  | 2034 |
| São Tomé and Príncipe | AFR  | LMIC | Gavi     | No  | No  | No  | 2044 |
| Suriname              | AMR  | UMIC | Non-Gavi | No  | No  | No  | 2040 |

|                              |      |      |          |     |     |     |      |
|------------------------------|------|------|----------|-----|-----|-----|------|
| Swaziland                    | AFR  | LMIC | Non-Gavi | No  | Yes | No  | 2036 |
| Syrian Arab Republic         | EMR  | LIC  | Gavi     | No  | No  | No  | 2036 |
| Chad                         | AFR  | LIC  | Gavi     | No  | No  | No  | 2033 |
| Togo                         | AFR  | LIC  | Gavi     | No  | No  | No  | 2041 |
| Thailand                     | SEAR | UMIC | Non-Gavi | Yes | Yes | No  | 2031 |
| Tajikistan                   | EUR  | LIC  | Gavi     | No  | No  | Yes | 2045 |
| Timor-Leste                  | SEAR | LMIC | Gavi     | No  | No  | No  | 2031 |
| Tunisia                      | EMR  | LMIC | Non-Gavi | No  | No  | No  | 2036 |
| Turkey                       | EUR  | UMIC | Non-Gavi | No  | No  | No  | 2030 |
| Tanzania, United Republic of | AFR  | LMIC | Gavi     | Yes | Yes | No  | 2031 |
| Uganda                       | AFR  | LIC  | Gavi     | Yes | Yes | No  | 2034 |
| Ukraine                      | EUR  | LMIC | Non-Gavi | No  | No  | Yes | 2033 |
| Uzbekistan                   | EUR  | LMIC | Gavi     | No  | No  | Yes | 2038 |
| Venezuela                    | AMR  | UMIC | Non-Gavi | No  | No  | No  | 2035 |
| Vietnam                      | WPR  | LMIC | Gavi     | Yes | No  | Yes | 2038 |
| Vanuatu                      | WPR  | LMIC | Non-Gavi | No  | No  | No  | 2042 |
| Yemen                        | EMR  | LIC  | Gavi     | No  | No  | No  | 2036 |
| South Africa                 | AFR  | UMIC | Non-Gavi | Yes | Yes | Yes | 2029 |
| Zambia                       | AFR  | LIC  | Gavi     | Yes | Yes | Yes | 2034 |
| Zimbabwe                     | AFR  | LMIC | Gavi     | No  | Yes | Yes | 2032 |

<sup>a</sup> LIC: Gross national income (GNI) per capita of \$1,085 or less; LMIC: GNI per capita of \$1,086 to \$4,225; UMIC: GNI per capita of \$4,256 to \$13,205 (World Bank 2021).

<sup>b</sup> High-TB, high-TB/HIV (HIV-associated TB), and high-MDR/RR-TB (multidrug/rifampicin-resistant TB) burden countries as defined by the World Health Organization.[51]

Note: Vaccine introduction was assumed to commence in 2028 and end in 2047. See Clark et al. ([https://doi.org/10.1016/S2214-109X\(23\)00045-1](https://doi.org/10.1016/S2214-109X(23)00045-1))[1] for introduction year methodology. AFR = African region; AMR = Region of the Americas; EMR = Eastern Mediterranean region; EUR = European region; LIC = low-income; LMIC = lower middle-income; SEAR = Southeast Asian region; TB = tuberculosis; UMIC = upper middle-income; WPR = Western Pacific region.

**Appendix S3. Sources and values of analytic inputs**

| Input                                                                                                                                   | Value/Assumption/Formula                                                                                                                 | Source                                                |
|-----------------------------------------------------------------------------------------------------------------------------------------|------------------------------------------------------------------------------------------------------------------------------------------|-------------------------------------------------------|
| <b>Total costs borne by TB-affected households, per episode</b>                                                                         | Stratified by country, income quintile, and cost category                                                                                | [52]                                                  |
| <b>Fraction of TB cases incurring catastrophic costs</b>                                                                                | Stratified by country and income quintile                                                                                                | [52]                                                  |
| <b>Risk ratio of TB disease across income strata</b>                                                                                    | Poorest quintile: Reference<br>Poorer quintile: 0.8479<br>Middle quintile: 0.7477<br>Richer quintile: 0.6221<br>Richest quintile: 0.5157 | Quantitative synthesis of TB prevalence surveys[9-19] |
| <b>Total costs borne by TB-affected households that are not accessing care/with untreated TB, compared to those accessing treatment</b> | 100% (50% and 150% in sensitivity analyses)                                                                                              | Assumption                                            |
| <b>Discount rate</b>                                                                                                                    | Health outcomes: 0%<br>Cost outcomes: 0% (3% in sensitivity analysis)                                                                    | [53]                                                  |

Note: TB = tuberculosis.

**Appendix S4. Costs borne by TB-affected households averted by infant tuberculosis vaccines (in millions), costs discounted at 3%.**

| Country grouping                   | Direct medical costs borne by TB-affected households averted | Direct non-medical costs borne by TB-affected households averted | Indirect costs borne by TB-affected households averted | Total costs borne by TB-affected households averted |
|------------------------------------|--------------------------------------------------------------|------------------------------------------------------------------|--------------------------------------------------------|-----------------------------------------------------|
| All countries                      | 629 (560–693)                                                | 1371 (1228–1516)                                                 | 1584 (1429–1757)                                       | 3584 (3241–3953)                                    |
| High-TB burden <sup>a</sup>        | 495 (431–554)                                                | 1206 (1069–1353)                                                 | 1284 (1141–1442)                                       | 2986 (2654–3332)                                    |
| High-TB/HIV burden <sup>a</sup>    | 405 (343–461)                                                | 1045 (910–1187)                                                  | 1123 (987–1273)                                        | 2573 (2246–2910)                                    |
| High-MDR/RR-TB burden <sup>a</sup> | 477 (414–535)                                                | 1081 (948–1223)                                                  | 1165 (1021–1322)                                       | 2722 (2399–3068)                                    |
| <b>Income level<sup>b</sup></b>    |                                                              |                                                                  |                                                        |                                                     |
| LIC                                | 109 (87.4–132)                                               | 190 (163–221)                                                    | 360 (293–434)                                          | 659 (544–780)                                       |
| LMIC                               | 422 (362–482)                                                | 1045 (911–1191)                                                  | 940 (822.8–1073)                                       | 2407 (2101–2748)                                    |
| UMIC                               | 98.0 (84.4–112)                                              | 136 (110–164)                                                    | 284 (210–372)                                          | 518 (410–644)                                       |
| <b>World region</b>                |                                                              |                                                                  |                                                        |                                                     |
| AFR                                | 293 (242–338)                                                | 654 (559–744)                                                    | 754 (644–866)                                          | 1701 (1463–1929)                                    |
| AMR                                | 16.9 (14.6–19.3)                                             | 16.2 (14.5–18.0)                                                 | 17.6 (15.7–19.7)                                       | 50.7 (45.5–56.1)                                    |
| EMR                                | 115 (90.2–142)                                               | 184 (141–230)                                                    | 311 (238–381)                                          | 611 (474–752)                                       |
| EUR                                | 13.2 (10.7–16.0)                                             | 6.46 (5.53–7.37)                                                 | 9.03 (7.55–10.5)                                       | 28.7 (23.8–33.6)                                    |
| SEAR                               | 114 (86.3–149)                                               | 376 (292–476)                                                    | 307 (242–390)                                          | 797 (616–1018)                                      |
| WPR                                | 76.3 (64.3–89.8)                                             | 134 (107–162)                                                    | 185 (143–230)                                          | 395 (317–477)                                       |

Note: Values in parentheses represent equal-tailed 95% credible intervals. Total costs included patient direct medical, direct non-medical, and indirect costs (all undiscounted) in 2020 USD.

<sup>a</sup> High-TB, high-TB/HIV (HIV-associated TB), and high-MDR/RR-TB (multidrug/rifampicin-resistant TB) burden countries as defined by the World Health Organization.

<sup>b</sup> LIC: Gross national income (GNI) per capita of \$1,085 or less; LMIC: GNI per capita of \$1,086 to \$4,225; UMIC: GNI per capita of \$4,256 to \$13,205 (World Bank 2021).

Note: All countries include 105 low- and middle-income countries analysed. AFR = African region; AMR = Region of the Americas; EMR = Eastern Mediterranean region; EUR = European region; GDP = gross domestic product; LIC = low-income; LMIC = lower middle-income; SEAR = Southeast Asian region; UMIC = upper middle-income; WPR = Western Pacific region.

**Appendix S5. Costs borne by TB-affected households averted by adolescent/adult tuberculosis vaccines (in millions), costs discounted at 3%.**

| Country grouping                   | Direct medical costs borne by TB-affected households averted | Direct non-medical costs borne by TB-affected households averted | Indirect costs borne by TB-affected households averted | Total costs borne by TB-affected households averted |
|------------------------------------|--------------------------------------------------------------|------------------------------------------------------------------|--------------------------------------------------------|-----------------------------------------------------|
| All countries                      | 4963 (4625–5302)                                             | 10110 (9471–10810)                                               | 11279 (10563–12109)                                    | 26352 (24817–28081)                                 |
| High-TB burden <sup>a</sup>        | 3798 (3496–4093)                                             | 8700 (8062–9359)                                                 | 9332 (8659–10084)                                      | 21831 (20374–23449)                                 |
| High-TB/HIV burden <sup>a</sup>    | 2558 (2326–2806)                                             | 7179 (6568–7825)                                                 | 7789 (7130–8517)                                       | 17526 (16096–19046)                                 |
| High-MDR/RR-TB burden <sup>a</sup> | 3864 (3564–4190)                                             | 7892 (7271–8533)                                                 | 8598 (7923–9334)                                       | 20354 (18855–21937)                                 |
| <b>Income level<sup>b</sup></b>    |                                                              |                                                                  |                                                        |                                                     |
| LIC                                | 574 (504–650)                                                | 1103 (1005–1208)                                                 | 1860 (1640–2101)                                       | 3537 (3154–3934)                                    |
| LMIC                               | 2742 (2484–3008)                                             | 7044 (6421–7672)                                                 | 6280 (5743–6848)                                       | 16067 (14699–17426)                                 |
| UMIC                               | 1647 (1478–1829)                                             | 1962 (1813–2122)                                                 | 3139 (2748–3547)                                       | 6748 (6152–7345)                                    |
| <b>World region</b>                |                                                              |                                                                  |                                                        |                                                     |
| AFR                                | 1415 (1286–1560)                                             | 3393 (3122–3678)                                                 | 4461 (4032–4928)                                       | 9268 (8511–10094)                                   |
| AMR                                | 298 (267–332)                                                | 385 (355–415)                                                    | 372 (342–404)                                          | 1056 (978–1133)                                     |
| EMR                                | 567 (482–660)                                                | 950 (793–1110)                                                   | 1448 (1212–1704)                                       | 2965 (2516–3453)                                    |
| EUR                                | 292 (248–343)                                                | 155 (139–171)                                                    | 208 (182–235)                                          | 655 (577–741)                                       |
| SEAR                               | 1116 (936–1314)                                              | 3714 (3192–4282)                                                 | 2879 (2449–3335)                                       | 7709 (6586–8901)                                    |
| WPR                                | 1275 (1128–1432)                                             | 1513 (1372–1666)                                                 | 1911 (1692–2154)                                       | 4699 (4249–5192)                                    |

Note: Values in parentheses represent equal-tailed 95% credible intervals. Total costs included patient direct medical, direct non-medical, and indirect costs (all undiscounted) in 2020 USD.

<sup>a</sup> High-TB, high-TB/HIV (HIV-associated TB), and high-MDR/RR-TB (multidrug/rifampicin-resistant TB) burden countries as defined by the World Health Organization.

<sup>b</sup> LIC: Gross national income (GNI) per capita of \$1,085 or less; LMIC: GNI per capita of \$1,086 to \$4,225; UMIC: GNI per capita of \$4,256 to \$13,205 (World Bank 2021).

Note: All countries include 105 low- and middle-income countries analysed. AFR = African region; AMR = Region of the Americas; EMR = Eastern Mediterranean region; EUR = European region; GDP = gross domestic product; LIC = low-income; LMIC = lower middle-income; SEAR = Southeast Asian region; UMIC = upper middle-income; WPR = Western Pacific region.

**Appendix S6. Costs borne by TB-affected households (in billions) and number of households with catastrophic costs (in millions) in the no-new-vaccine baseline.**

| Country grouping                   | Direct medical costs borne by TB-affected households | Direct non-medical costs borne by TB-affected households | Indirect costs borne by TB-affected households | Total costs borne by TB-affected households | Number of households with catastrophic costs |
|------------------------------------|------------------------------------------------------|----------------------------------------------------------|------------------------------------------------|---------------------------------------------|----------------------------------------------|
| All countries                      | 39.5 (36.7–42.4)                                     | 78.3 (73.5–83.3)                                         | 85.2 (79.3–91.3)                               | 203 (191–215)                               | 118 (111–126)                                |
| High-TB burden <sup>a</sup>        | 29.1 (26.7–31.5)                                     | 65.7 (60.8–70.8)                                         | 69.6 (64.3–75.4)                               | 164 (153–176)                               | 102 (94.8–110)                               |
| High-TB/HIV burden <sup>a</sup>    | 18.7 (16.8–20.7)                                     | 53.4 (48.7–58.4)                                         | 57.1 (52.0–62.4)                               | 129 (118–141)                               | 86.2 (78.9–93.9)                             |
| High-MDR/RR-TB burden <sup>a</sup> | 30.6 (28.0–33.3)                                     | 60.1 (55.3–65.1)                                         | 64.3 (59.0–70.0)                               | 155 (143–167)                               | 91.5 (84.1–99.4)                             |
| Income level <sup>b</sup>          |                                                      |                                                          |                                                |                                             |                                              |
| LIC                                | 4.27 (3.89–4.71)                                     | 8.46 (7.85–9.08)                                         | 13.3 (12.1–14.6)                               | 26.1 (24.0–28.2)                            | 16.7 (15.5–17.9)                             |
| LMIC                               | 22.1 (20.0–24.2)                                     | 54.2 (49.4–58.9)                                         | 48.2 (43.9–52.3)                               | 125 (114–135)                               | 88.6 (80.9–95.9)                             |
| UMIC                               | 13.1 (11.7–14.5)                                     | 15.6 (14.4–16.9)                                         | 23.6 (20.9–26.9)                               | 52.4 (47.5–57.3)                            | 12.8 (11.5–14.4)                             |
| World region                       |                                                      |                                                          |                                                |                                             |                                              |
| AFR                                | 10.1 (8.80–11.3)                                     | 24.2 (21.7–26.7)                                         | 32.3 (28.7–36.2)                               | 66.6 (59.7–73.7)                            | 40.9 (37.2–44.7)                             |
| AMR                                | 2.51 (2.26–2.78)                                     | 3.49 (3.22–3.74)                                         | 3.24 (2.99–3.51)                               | 9.24 (8.62–9.91)                            | 2.02 (1.88–2.15)                             |
| EMR                                | 3.75 (3.27–4.28)                                     | 6.48 (5.54–7.47)                                         | 9.10 (7.76–10.4)                               | 19.3 (16.8–21.9)                            | 10.8 (9.05–12.8)                             |
| EUR                                | 3.29 (2.86–3.83)                                     | 1.59 (1.45–1.75)                                         | 2.25 (2.00–2.53)                               | 7.14 (6.39–8.01)                            | 1.16 (1.06–1.27)                             |
| SEAR                               | 9.07 (7.73–10.4)                                     | 30.4 (26.7–34.4)                                         | 23.0 (19.9–26.2)                               | 62.5 (54.6–70.9)                            | 48.7 (42.7–55.1)                             |
| WPR                                | 10.8 (9.41–12.2)                                     | 12.2 (10.9–13.5)                                         | 15.2 (13.5–17.3)                               | 38.2 (34.4–42.5)                            | 14.5 (12.5–16.8)                             |

Note: Values in parentheses represent equal-tailed 95% credible intervals. Total costs included patient direct medical, direct non-medical, and indirect costs (all undiscounted) over 2028–2050 in 2020 USD. Catastrophic costs are defined as instances where the patient costs (either direct medical only or total) incurred during an episode of TB disease exceeded 20% of total annual household income.

<sup>a</sup> High-TB, high-TB/HIV (HIV-associated TB), and high-MDR/RR-TB (multidrug/rifampicin-resistant TB) burden countries as defined by the World Health Organization.

<sup>b</sup> LIC: Gross national income (GNI) per capita of \$1,085 or less; LMIC: GNI per capita of \$1,086 to \$4,225; UMIC: GNI per capita of \$4,256 to \$13,205 (World Bank 2021).

Note: All countries include 105 low- and middle-income countries analysed. AFR = African region; AMR = Region of the Americas; EMR = Eastern Mediterranean region; EUR = European region; GDP = gross domestic product; LIC = low-income; LMIC = lower middle-income; SEAR = Southeast Asian region; UMIC = upper middle-income; WPR = Western Pacific region.



**Appendix S7. Percent reduction in costs borne by TB-affected households averted and number of households with catastrophic costs averted by infant tuberculosis vaccines compared to no-new-vaccine baseline.**

| Country grouping                   | Direct medical costs borne by TB-affected households | Direct non-medical costs borne by TB-affected households | Indirect costs borne by TB-affected households | Total costs borne by TB-affected households | Number of households with catastrophic costs |
|------------------------------------|------------------------------------------------------|----------------------------------------------------------|------------------------------------------------|---------------------------------------------|----------------------------------------------|
| All countries                      | 2.62 (2.37–2.94)                                     | 2.89 (2.64–3.19)                                         | 3.06 (2.81–3.34)                               | 2.91 (2.67–3.19)                            | 3.13 (2.86–3.43)                             |
| High-TB burden <sup>a</sup>        | 2.80 (2.48–3.20)                                     | 3.03 (2.73–3.39)                                         | 3.03 (2.75–3.36)                               | 2.99 (2.71–3.35)                            | 3.24 (2.94–3.60)                             |
| High-TB/HIV burden <sup>a</sup>    | 3.58 (3.10–4.21)                                     | 3.24 (2.88–3.69)                                         | 3.24 (2.89–3.62)                               | 3.29 (2.93–3.71)                            | 3.30 (2.97–3.69)                             |
| High-MDR/RR-TB burden <sup>a</sup> | 2.57 (2.26–2.95)                                     | 2.97 (2.65–3.36)                                         | 2.97 (2.67–3.32)                               | 2.89 (2.59–3.25)                            | 3.16 (2.83–3.56)                             |
| Income level <sup>b</sup>          |                                                      |                                                          |                                                |                                             |                                              |
| LIC                                | 4.23 (3.62–4.94)                                     | 3.74 (3.34–4.24)                                         | 4.48 (3.88–5.24)                               | 4.20 (3.66–4.86)                            | 3.65 (3.26–4.20)                             |
| LMIC                               | 3.17 (2.74–3.71)                                     | 3.19 (2.84–3.64)                                         | 3.23 (2.88–3.66)                               | 3.20 (2.84–3.66)                            | 3.22 (2.88–3.65)                             |
| UMIC                               | 1.19 (1.07–1.34)                                     | 1.39 (1.16–1.67)                                         | 1.92 (1.52–2.44)                               | 1.58 (1.30–1.93)                            | 1.78 (1.41–2.25)                             |
| World region                       |                                                      |                                                          |                                                |                                             |                                              |
| AFR                                | 4.84 (4.04–5.94)                                     | 4.47 (3.86–5.31)                                         | 3.83 (3.34–4.42)                               | 4.21 (3.65–4.95)                            | 4.36 (3.82–5.06)                             |
| AMR                                | 1.07 (0.99–1.16)                                     | 0.74 (0.68–0.81)                                         | 0.86 (0.79–0.94)                               | 0.87 (0.81–0.95)                            | 0.73 (0.66–0.80)                             |
| EMR                                | 5.07 (4.23–6.01)                                     | 4.67 (3.83–5.67)                                         | 5.64 (4.68–6.74)                               | 5.20 (4.34–6.16)                            | 4.66 (3.77–5.79)                             |
| EUR                                | 0.66 (0.58–0.76)                                     | 0.66 (0.59–0.73)                                         | 0.66 (0.58–0.74)                               | 0.66 (0.58–0.74)                            | 0.65 (0.58–0.74)                             |
| SEAR                               | 2.10 (1.72–2.58)                                     | 2.07 (1.74–2.48)                                         | 2.23 (1.87–2.65)                               | 2.13 (1.79–2.55)                            | 2.08 (1.75–2.48)                             |
| WPR                                | 1.13 (0.98–1.30)                                     | 1.78 (1.46–2.13)                                         | 1.97 (1.59–2.41)                               | 1.67 (1.38–2.00)                            | 2.59 (2.07–3.23)                             |

Note: Values in parentheses represent equal-tailed 95% credible intervals. Total costs included patient direct medical, direct non-medical, and indirect costs (all undiscounted) over 2028–2050. Catastrophic costs are defined as instances where the patient costs (either direct medical only or total) incurred during an episode of TB disease exceeded 20% of total annual household income.

<sup>a</sup> High-TB, high-TB/HIV (HIV-associated TB), and high-MDR/RR-TB (multidrug/rifampicin-resistant TB) burden countries as defined by the World Health Organization.

<sup>b</sup> LIC: Gross national income (GNI) per capita of \$1,085 or less; LMIC: GNI per capita of \$1,086 to \$4,225; UMIC: GNI per capita of \$4,256 to \$13,205 (World Bank 2021).

Note: All countries include 105 low- and middle-income countries analysed. AFR = African region; AMR = Region of the Americas; EMR = Eastern Mediterranean region; EUR = European region; GDP = gross domestic product; LIC = low-income; LMIC = lower middle-income; SEAR = Southeast Asian region; UMIC = upper middle-income; WPR = Western Pacific region.

**Appendix S8. Percent reduction in costs borne by TB-affected households averted and number of households with catastrophic costs averted by adolescent/adult tuberculosis vaccines compared to no-new-vaccine baseline.**

| Country grouping                   | Direct medical costs borne by TB-affected households | Direct non-medical costs borne by TB-affected households | Indirect costs borne by TB-affected households | Total costs borne by TB-affected households | Number of households with catastrophic costs |
|------------------------------------|------------------------------------------------------|----------------------------------------------------------|------------------------------------------------|---------------------------------------------|----------------------------------------------|
| All countries                      | 2.62 (2.37–2.94)                                     | 2.89 (2.64–3.19)                                         | 3.06 (2.81–3.34)                               | 2.91 (2.67–3.19)                            | 3.13 (2.86–3.43)                             |
| High-TB burden <sup>a</sup>        | 2.80 (2.48–3.20)                                     | 3.03 (2.73–3.39)                                         | 3.03 (2.75–3.36)                               | 2.99 (2.71–3.35)                            | 3.24 (2.94–3.60)                             |
| High-TB/HIV burden <sup>a</sup>    | 3.58 (3.10–4.21)                                     | 3.24 (2.88–3.69)                                         | 3.24 (2.89–3.62)                               | 3.29 (2.93–3.71)                            | 3.30 (2.97–3.69)                             |
| High-MDR/RR-TB burden <sup>a</sup> | 2.57 (2.26–2.95)                                     | 2.97 (2.65–3.36)                                         | 2.97 (2.67–3.32)                               | 2.89 (2.59–3.25)                            | 3.16 (2.83–3.56)                             |
| Income level <sup>b</sup>          |                                                      |                                                          |                                                |                                             |                                              |
| LIC                                | 4.23 (3.62–4.94)                                     | 3.74 (3.34–4.24)                                         | 4.48 (3.88–5.24)                               | 4.2 (3.66–4.86)                             | 3.65 (3.26–4.20)                             |
| LMIC                               | 3.17 (2.74–3.71)                                     | 3.19 (2.84–3.64)                                         | 3.23 (2.88–3.66)                               | 3.2 (2.84–3.66)                             | 3.22 (2.88–3.65)                             |
| UMIC                               | 1.19 (1.07–1.34)                                     | 1.39 (1.16–1.67)                                         | 1.92 (1.52–2.44)                               | 1.58 (1.3–1.93)                             | 1.78 (1.41–2.25)                             |
| World region                       |                                                      |                                                          |                                                |                                             |                                              |
| AFR                                | 4.84 (4.04–5.94)                                     | 4.47 (3.86–5.31)                                         | 3.83 (3.34–4.42)                               | 4.21 (3.65–4.95)                            | 4.36 (3.82–5.06)                             |
| AMR                                | 1.07 (0.99–1.16)                                     | 0.74 (0.68–0.81)                                         | 0.86 (0.79–0.94)                               | 0.87 (0.81–0.95)                            | 0.73 (0.66–0.80)                             |
| EMR                                | 5.07 (4.23–6.01)                                     | 4.67 (3.83–5.67)                                         | 5.64 (4.68–6.74)                               | 5.20 (4.34–6.16)                            | 4.66 (3.77–5.79)                             |
| EUR                                | 0.66 (0.58–0.76)                                     | 0.66 (0.59–0.73)                                         | 0.66 (0.58–0.74)                               | 0.66 (0.58–0.74)                            | 0.65 (0.58–0.74)                             |
| SEAR                               | 2.10 (1.72–2.58)                                     | 2.07 (1.74–2.48)                                         | 2.23 (1.87–2.65)                               | 2.13 (1.79–2.55)                            | 2.08 (1.75–2.48)                             |
| WPR                                | 1.13 (0.98–1.30)                                     | 1.78 (1.46–2.13)                                         | 1.97 (1.59–2.41)                               | 1.67 (1.38–2.00)                            | 2.59 (2.07–3.23)                             |

Note: Values in parentheses represent equal-tailed 95% credible intervals. Total costs included patient direct medical, direct non-medical, and indirect costs (all undiscounted) over 2028–2050. Catastrophic costs are defined as instances where the patient costs (either direct medical only or total) incurred during an episode of TB disease exceeded 20% of total annual household income.

<sup>a</sup> High-TB, high-TB/HIV (HIV-associated TB), and high-MDR/RR-TB (multidrug/rifampicin-resistant TB) burden countries as defined by the World Health Organization.

<sup>b</sup> LIC: Gross national income (GNI) per capita of \$1,085 or less; LMIC: GNI per capita of \$1,086 to \$4,225; UMIC: GNI per capita of \$4,256 to \$13,205 (World Bank 2021).

Note: All countries include 105 low- and middle-income countries analysed. AFR = African region; AMR = Region of the Americas; EMR = Eastern Mediterranean region; EUR = European region; GDP = gross domestic product; LIC = low-income; LMIC = lower middle-income; SEAR = Southeast Asian region; UMIC = upper middle-income; WPR = Western Pacific region.

**Appendix S9. Tuberculosis cases averted, costs borne by TB-affected households averted, and number of households with catastrophic costs averted by infant and adolescent/adult tuberculosis vaccines (in millions) across 105 low- and middle-income countries by income quintile.**

|                                                                  |                          | Poorest          | Poorer           | Middle           | Richer           | Richest          |
|------------------------------------------------------------------|--------------------------|------------------|------------------|------------------|------------------|------------------|
| Tuberculosis cases averted                                       | Infant vaccine           | 2.06 (1.83–2.30) | 1.74 (1.55–1.95) | 1.18 (1.05–1.32) | 0.98 (0.87–1.10) | 0.81 (0.72–0.91) |
|                                                                  | Adolescent/adult vaccine | 9.55 (8.79–10.3) | 8.1 (7.46–8.74)  | 5.6 (5.15–6.09)  | 4.66 (4.28–5.07) | 3.86 (3.55–4.2)  |
| Direct medical costs borne by TB-affected households averted     | Infant vaccine           | 207 (182–230)    | 202 (179–225)    | 181 (160–200)    | 213 (189–235)    | 237 (210–265)    |
|                                                                  | Adolescent/adult vaccine | 999 (924–1082)   | 984 (912–1059)   | 904 (837–976)    | 1076 (994–1159)  | 1213 (1110–1319) |
| Direct non-medical costs borne by TB-affected households averted | Infant vaccine           | 555 (495–616)    | 545 (483–605)    | 395 (354–440)    | 393 (352–439)    | 386 (346–431)    |
|                                                                  | Adolescent/adult vaccine | 2589 (2402–2784) | 2544 (2362–2735) | 1895 (1756–2043) | 1888 (1749–2035) | 1854 (1710–2008) |
| Indirect costs borne by TB-affected households averted           | Infant vaccine           | 246 (221–271)    | 440 (393–490)    | 470 (423–524)    | 663 (596–738)    | 799 (712–896)    |
|                                                                  | Adolescent/adult vaccine | 1107 (1031–1185) | 1974 (1842–2123) | 2169 (2019–2343) | 3049 (2838–3287) | 3673 (3387–3988) |
| Total costs borne by TB-affected households averted              | Infant vaccine           | 1007 (900–1115)  | 1187 (1058–1313) | 1046 (942–1157)  | 1268 (1144–1401) | 1423 (1274–1579) |
|                                                                  | Adolescent/adult vaccine | 4695 (4384–5019) | 5502 (5151–5874) | 4968 (4641–5339) | 6014 (5637–6447) | 6740 (6288–7231) |
| Number of households with catastrophic costs averted             | Infant vaccine           | 1.47 (1.31–1.63) | 0.97 (0.86–1.08) | 0.55 (0.49–0.61) | 0.41 (0.37–0.45) | 0.32 (0.28–0.35) |
|                                                                  | Adolescent/adult vaccine | 6.62 (6.13–7.11) | 4.26 (3.96–4.58) | 2.44 (2.26–2.64) | 1.81 (1.68–1.96) | 1.41 (1.31–1.52) |

Note: Total costs included patient direct medical, direct non-medical, and indirect costs (all undiscounted) in 2020 USD. Costs borne by TB-affected households are categorized as “catastrophic” if they exceed 20% of total household’s annual income.

**Appendix S10. Percentage of households experiencing catastrophic costs by gross domestic product (GDP) per capita and by income quintile in 105 low- and middle-income countries.**

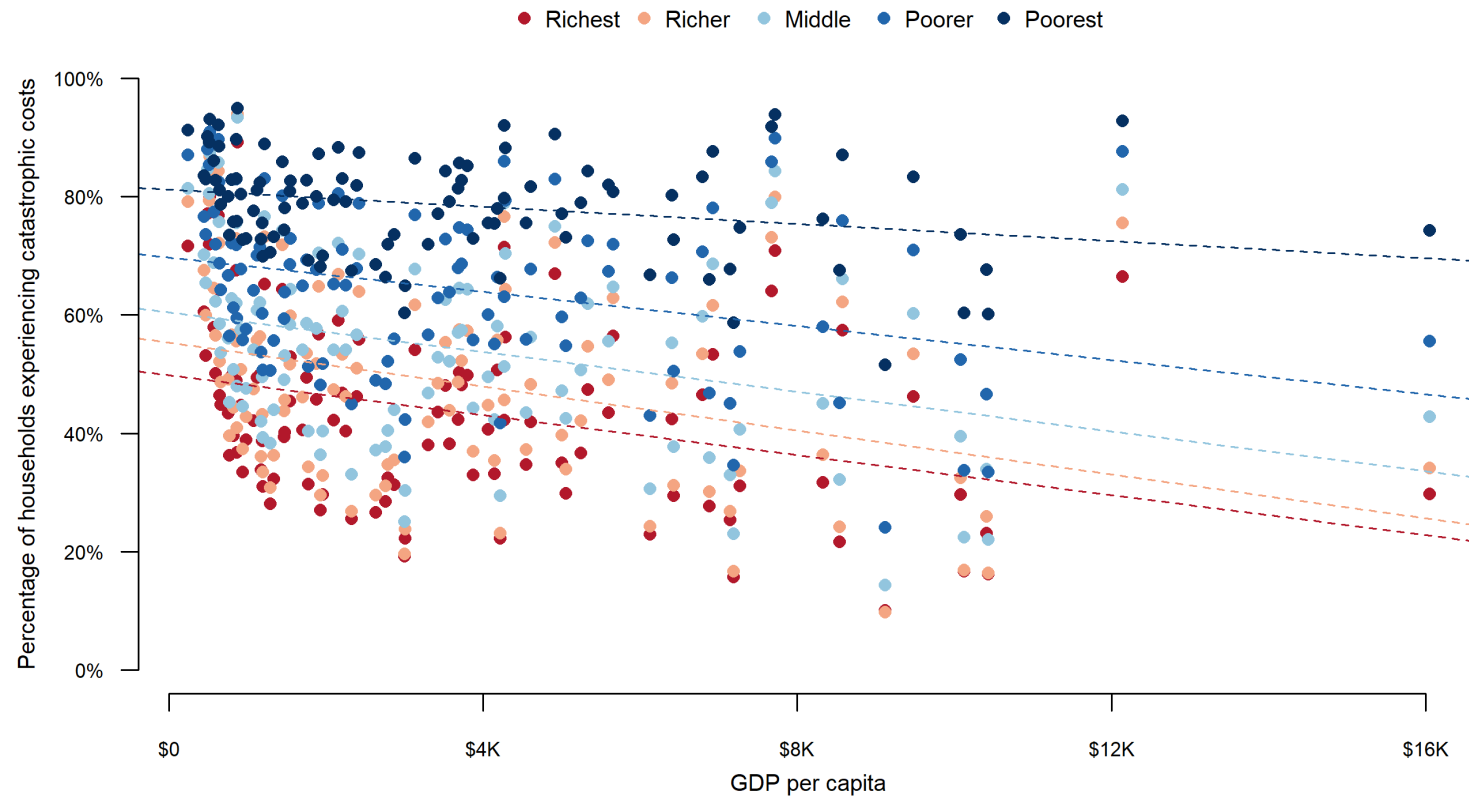

**Appendix S11. Distribution of costs borne by TB-affected households averted by an adolescent/adult vaccine across all modelled strata, ordered by household income.**

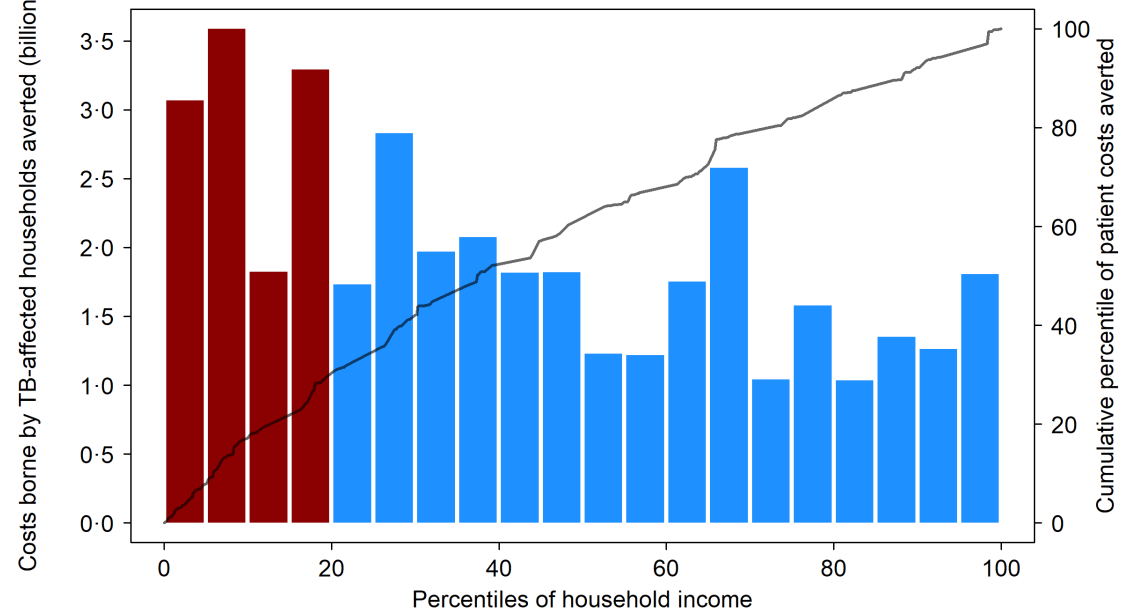

Note: TB = tuberculosis, CC = catastrophic costs. Ordering of population by household income based on average 2020 per capita GDP in purchasing power parity (PPP) dollars, for each modelled stratum (505 total strata). Bars shaded red indicate poorest 20% of modelled population by PPP GDP per capita.

**Appendix S12. Costs borne by TB-affected households averted and number of households with catastrophic costs averted by adolescent/adult vaccines (in millions): 75% efficacy scenario.**

| Country grouping                   | Direct medical costs borne by TB-affected households averted | Direct non-medical costs borne by TB-affected households averted | Indirect costs borne by TB-affected households averted | Total costs borne by TB-affected households averted | Number of households with catastrophic costs averted |
|------------------------------------|--------------------------------------------------------------|------------------------------------------------------------------|--------------------------------------------------------|-----------------------------------------------------|------------------------------------------------------|
| All countries                      | 10613 (9889–11347)                                           | 21893 (20494–23438)                                              | 24305 (22742–26094)                                    | 56812 (53484–60618)                                 | 33.4 (31.2–35.8)                                     |
| High-TB burden <sup>a</sup>        | 8094 (7456–8735)                                             | 18805 (17395–20295)                                              | 20086 (18629–21731)                                    | 46985 (43777–50586)                                 | 29.6 (27.3–31.8)                                     |
| High-TB/HIV burden <sup>a</sup>    | 5546 (5040–6085)                                             | 15625 (14254–17071)                                              | 16861 (15409–18467)                                    | 38032 (34936–41398)                                 | 25.2 (23.1–27.4)                                     |
| High-MDR/RR-TB burden <sup>a</sup> | 8229 (7573–8945)                                             | 17047 (15674–18476)                                              | 18455 (16975–20092)                                    | 43732 (40469–47176)                                 | 26.1 (23.9–28.3)                                     |
| <b>Income level<sup>b</sup></b>    |                                                              |                                                                  |                                                        |                                                     |                                                      |
| LIC                                | 1261 (1111–1427)                                             | 2443 (2227–2669)                                                 | 4089 (3608–4616)                                       | 7793 (6961–8654)                                    | 4.82 (4.39–5.25)                                     |
| LMIC                               | 6023 (5454–6605)                                             | 15437 (14085–16812)                                              | 13720 (12541–14966)                                    | 35180 (32139–38183)                                 | 25.2 (23.0–27.3)                                     |
| UMIC                               | 3329 (2975–3690)                                             | 4014 (3694–4340)                                                 | 6496 (5671–7359)                                       | 13839 (12574–15100)                                 | 3.40 (3.04–3.79)                                     |
| <b>World region</b>                |                                                              |                                                                  |                                                        |                                                     |                                                      |
| AFR                                | 3098 (2812–3417)                                             | 7429 (6833–8059)                                                 | 9720 (8808–10731)                                      | 20246 (18603–22045)                                 | 12.5 (11.6–13.4)                                     |
| AMR                                | 610 (546–679)                                                | 792 (731–853)                                                    | 762 (699–828)                                          | 2164 (2001–2327)                                    | 0.45 (0.42–0.48)                                     |
| EMR                                | 1212 (1026–1413)                                             | 2029 (1693–2384)                                                 | 3080 (2574–3632)                                       | 6320 (5351–7363)                                    | 3.39 (2.78–4.06)                                     |
| EUR                                | 631 (536–746)                                                | 326 (291–361)                                                    | 443 (388–502)                                          | 1400 (1231–1592)                                    | 0.22 (0.20–0.25)                                     |
| SEAR                               | 2454 (2061–2892)                                             | 8189 (7032–9432)                                                 | 6323 (5374–7332)                                       | 16966 (14500–19571)                                 | 13.0 (11.2–14.9)                                     |
| WPR                                | 2609 (2304–2935)                                             | 3129 (2830–3465)                                                 | 3978 (3509–4510)                                       | 9715 (8756–10750)                                   | 3.90 (3.38–4.52)                                     |

Note: Values in parentheses represent equal-tailed 95% credible intervals. Total costs included patient direct medical, direct non-medical, and indirect costs (all undiscounted) in 2020 USD. Costs borne by TB-affected households are categorized as “catastrophic” if they exceed 20% of total household’s annual income.

<sup>a</sup> High-TB, high-TB/HIV (HIV-associated TB), and high-MDR/RR-TB (multidrug/rifampicin-resistant TB) burden countries as defined by the World Health Organization.

<sup>b</sup> LIC: Gross national income (GNI) per capita of \$1,085 or less; LMIC: GNI per capita of \$1,086 to \$4,225; UMIC: GNI per capita of \$4,256 to \$13,205 (World Bank 2021).

Note: All countries include 105 low- and middle-income countries analysed. AFR = African region; AMR = Region of the Americas; EMR = Eastern Mediterranean region; EUR = European region; GDP = gross domestic product; LIC = low-income; LMIC = lower middle-income; SEAR = Southeast Asian region; UMIC = upper middle-income; WPR = Western Pacific region.

**Appendix S13. Costs borne by TB-affected households averted and number of households with catastrophic costs averted by infant vaccines (in millions): accelerated scale-up scenario.**

| Country grouping                   | Direct medical costs borne by TB-affected households averted | Direct non-medical costs borne by TB-affected households averted | Indirect costs borne by TB-affected households averted | Total costs borne by TB-affected households averted | Number of households with catastrophic costs averted |
|------------------------------------|--------------------------------------------------------------|------------------------------------------------------------------|--------------------------------------------------------|-----------------------------------------------------|------------------------------------------------------|
| All countries                      | 2441 (2190–2700)                                             | 5434 (4883–6053)                                                 | 5972 (5397–6629)                                       | 13847 (12506–15274)                                 | 8.83 (7.93–9.80)                                     |
| High-TB burden <sup>a</sup>        | 1800 (1571–2035)                                             | 4639 (4098–5253)                                                 | 4717 (4213–5285)                                       | 11156 (9922–12518)                                  | 7.73 (6.87–8.70)                                     |
| High-TB/HIV burden <sup>a</sup>    | 1484 (1260–1708)                                             | 4059 (3544–4647)                                                 | 4123 (3637–4678)                                       | 9666 (8494–11002)                                   | 6.66 (5.84–7.58)                                     |
| High-MDR/RR-TB burden <sup>a</sup> | 1794 (1561–2036)                                             | 4179 (3655–4783)                                                 | 4241 (3751–4803)                                       | 10214 (8997–11559)                                  | 6.77 (5.95–7.72)                                     |
| <b>Income level<sup>b</sup></b>    |                                                              |                                                                  |                                                        |                                                     |                                                      |
| LIC                                | 449 (372–532)                                                | 807 (704–920)                                                    | 1456 (1228–1721)                                       | 2712 (2308–3148)                                    | 1.54 (1.34–1.79)                                     |
| LMIC                               | 1686 (1461–1928)                                             | 4223 (3693–4836)                                                 | 3708 (3263–4252)                                       | 9616 (8443–11011)                                   | 6.87 (6.04–7.85)                                     |
| UMIC                               | 306 (267–348)                                                | 405 (337–478)                                                    | 808 (612–1042)                                         | 1519 (1229–1850)                                    | 0.42 (0.32–0.52)                                     |
| <b>World region</b>                |                                                              |                                                                  |                                                        |                                                     |                                                      |
| AFR                                | 1016 (862–1159)                                              | 2290 (2001–2581)                                                 | 2614 (2297–2951)                                       | 5919 (5199–6649)                                    | 3.81 (3.37–4.28)                                     |
| AMR                                | 64.2 (55.8–72.5)                                             | 65.7 (59.8–73.1)                                                 | 67.6 (60.8–75.3)                                       | 198 (179–218)                                       | 0.039 (0.035–0.044)                                  |
| EMR                                | 404 (316–492)                                                | 636 (494–791)                                                    | 1071 (820–1313)                                        | 2111 (1649–2578)                                    | 1.06 (0.80–1.35)                                     |
| EUR                                | 122 (95.0–156)                                               | 46.3 (37.5–57.4)                                                 | 75.7 (60.8–94.6)                                       | 243 (196–307)                                       | 0.04 (0.03–0.05)                                     |
| SEAR                               | 575 (430–755)                                                | 1955 (1536–2477)                                                 | 1531 (1195–1942)                                       | 4061 (3173–5163)                                    | 3.12 (2.47–3.90)                                     |
| WPR                                | 261 (219–310)                                                | 441 (361–527)                                                    | 612 (484–747)                                          | 1314 (1075–1558)                                    | 0.76 (0.59–0.93)                                     |

Note: Values in parentheses represent equal-tailed 95% credible intervals. Total costs included patient direct medical, direct non-medical, and indirect costs (all undiscounted) in 2020 USD. Costs borne by TB-affected households are categorized as “catastrophic” if they exceed 20% of total household’s annual income.

<sup>a</sup> High-TB, high-TB/HIV (HIV-associated TB), and high-MDR/RR-TB (multidrug/rifampicin-resistant TB) burden countries as defined by the World Health Organization.

<sup>b</sup> LIC: Gross national income (GNI) per capita of \$1,085 or less; LMIC: GNI per capita of \$1,086 to \$4,225; UMIC: GNI per capita of \$4,256 to \$13,205 (World Bank 2021).

Note: All countries include 105 low- and middle-income countries analysed. AFR = African region; AMR = Region of the Americas; EMR = Eastern Mediterranean region; EUR = European region; GDP = gross domestic product; LIC = low-income; LMIC = lower middle-income; SEAR = Southeast Asian region; UMIC = upper middle-income; WPR = Western Pacific region.

**Appendix S14. Costs borne by TB-affected households averted and number of households with catastrophic costs averted by adolescent/adult tuberculosis vaccines (in millions): accelerated scale-up scenario.**

| Country grouping                   | Direct medical costs borne by TB-affected households averted | Direct non-medical costs borne by TB-affected households averted | Indirect costs borne by TB-affected households averted | Total costs borne by TB-affected households averted | Number of households with catastrophic costs averted |
|------------------------------------|--------------------------------------------------------------|------------------------------------------------------------------|--------------------------------------------------------|-----------------------------------------------------|------------------------------------------------------|
| All countries                      | 11021 (10308–11771)                                          | 22358 (20909–23896)                                              | 24279 (22813–25976)                                    | 57658 (54410–61314)                                 | 33.9 (31.7–36.3)                                     |
| High-TB burden <sup>a</sup>        | 8015 (7389–8634)                                             | 18794 (17329–20281)                                              | 19566 (18171–21086)                                    | 46375 (43173–49852)                                 | 29.5 (27.2–31.8)                                     |
| High-TB/HIV burden <sup>a</sup>    | 5505 (4986–6025)                                             | 15672 (14328–17104)                                              | 16345 (15020–17807)                                    | 37522 (34506–40766)                                 | 25.1 (23–27.4)                                       |
| High-MDR/RR-TB burden <sup>a</sup> | 8430 (7776–9130)                                             | 17210 (15762–18693)                                              | 18068 (16691–19547)                                    | 43708 (40371–47120)                                 | 26.3 (24.0–28.6)                                     |
| <b>Income level<sup>b</sup></b>    |                                                              |                                                                  |                                                        |                                                     |                                                      |
| LIC                                | 1352 (1197–1524)                                             | 2579 (2369–2809)                                                 | 4263 (3790–4788)                                       | 8194 (7370–9073)                                    | 4.97 (4.56–5.38)                                     |
| LMIC                               | 6537 (5976–7124)                                             | 16118 (14739–17531)                                              | 14291 (13060–15559)                                    | 36947 (33837–40094)                                 | 26.0 (23.8–28.2)                                     |
| UMIC                               | 3132 (2825–3482)                                             | 3660 (3401–3943)                                                 | 5725 (5058–6420)                                       | 12517 (11464–13560)                                 | 3.00 (2.71–3.31)                                     |
| <b>World region</b>                |                                                              |                                                                  |                                                        |                                                     |                                                      |
| AFR                                | 3042 (2796–3296)                                             | 7198 (6706–7706)                                                 | 9173 (8400–9995)                                       | 19413 (17988–20873)                                 | 12.0 (11.3–12.8)                                     |
| AMR                                | 648 (580–718)                                                | 825 (767–885)                                                    | 794 (733–859)                                          | 2267 (2104–2425)                                    | 0.48 (0.44–0.51)                                     |
| EMR                                | 1197 (1020–1390)                                             | 1986 (1667–2305)                                                 | 3013 (2535–3526)                                       | 6196 (5290–7196)                                    | 3.28 (2.71–3.89)                                     |
| EUR                                | 909 (774–1073)                                               | 415 (373–460)                                                    | 609 (535–689)                                          | 1933 (1713–2190)                                    | 0.31 (0.28–0.35)                                     |
| SEAR                               | 2669 (2238–3114)                                             | 8974 (7684–10314)                                                | 6888 (5852–7939)                                       | 18531 (15779–21289)                                 | 14.2 (12.3–16.2)                                     |
| WPR                                | 2556 (2268–2879)                                             | 2961 (2707–3249)                                                 | 3801 (3386–4258)                                       | 9318 (8475–10274)                                   | 3.64 (3.22–4.17)                                     |

Note: Values in parentheses represent equal-tailed 95% credible intervals. Total costs included patient direct medical, direct non-medical, and indirect costs (all undiscounted) in 2020 USD. Costs borne by TB-affected households are categorized as “catastrophic” if they exceed 20% of total household’s annual income.

<sup>a</sup> High-TB, high-TB/HIV (HIV-associated TB), and high-MDR/RR-TB (multidrug/rifampicin-resistant TB) burden countries as defined by the World Health Organization.

<sup>b</sup> LIC: Gross national income (GNI) per capita of \$1,025 or less; LMIC: GNI per capita of \$1,026 to \$3,995; UMIC: GNI per capita of \$3,996 to \$12,375 (World Bank 2019).

Note: All countries include 105 low- and middle-income countries analysed. AFR = African region; AMR = Region of the Americas; EMR = Eastern Mediterranean region; EUR = European region; GDP = gross domestic product; LIC = low-income; LMIC = lower middle-income; SEAR = Southeast Asian region; UMIC = upper middle-income; WPR = Western Pacific region.



**Appendix S15. Costs borne by TB-affected households averted and number of households with catastrophic costs averted by infant tuberculosis vaccines (in millions), assuming costs for untreated cases are 0.5x treated cases.**

| Country grouping                   | Direct medical costs borne by TB-affected households averted | Direct non-medical costs borne by TB-affected households averted | Indirect costs borne by TB-affected households averted | Total costs borne by TB-affected households averted | Number of households with catastrophic costs averted |
|------------------------------------|--------------------------------------------------------------|------------------------------------------------------------------|--------------------------------------------------------|-----------------------------------------------------|------------------------------------------------------|
| All countries                      | 713 (641–781)                                                | 1570 (1422–1718)                                                 | 1885 (1713–2073)                                       | 4168 (3798–4572)                                    | 2.80 (2.53–3.07)                                     |
| High-TB burden <sup>a</sup>        | 546 (481–609)                                                | 1371 (1228–1522)                                                 | 1504 (1345–1675)                                       | 3422 (3075–3784)                                    | 2.49 (2.22–2.76)                                     |
| High-TB/HIV burden <sup>a</sup>    | 441 (379–501)                                                | 1174 (1037–1319)                                                 | 1305 (1161–1467)                                       | 2920 (2589–3280)                                    | 2.12 (1.88–2.36)                                     |
| High-MDR/RR-TB burden <sup>a</sup> | 525 (460–588)                                                | 1223 (1080–1377)                                                 | 1360 (1208–1531)                                       | 3108 (2770–3474)                                    | 2.16 (1.91–2.42)                                     |
| <b>Income level<sup>b</sup></b>    |                                                              |                                                                  |                                                        |                                                     |                                                      |
| LIC                                | 136 (110–165)                                                | 234 (202–271)                                                    | 459 (379–553)                                          | 829 (694–982)                                       | 0.51 (0.44–0.60)                                     |
| LMIC                               | 464 (401–527)                                                | 1180 (1038–1337)                                                 | 1092 (966–1238)                                        | 2736 (2416–3096)                                    | 2.12 (1.87–2.38)                                     |
| UMIC                               | 113 (98–129)                                                 | 156 (130–185)                                                    | 335 (255–426)                                          | 603 (489–734)                                       | 0.18 (0.14–0.23)                                     |
| <b>World region</b>                |                                                              |                                                                  |                                                        |                                                     |                                                      |
| AFR                                | 300 (252–346)                                                | 688 (599–783)                                                    | 835 (721–951)                                          | 1822 (1588–2062)                                    | 1.31 (1.15–1.48)                                     |
| AMR                                | 21.8 (19.0–24.7)                                             | 20.5 (18.5–22.5)                                                 | 22.7 (20.4–25.1)                                       | 65 (58.6–71.4)                                      | 0.012 (0.011–0.013)                                  |
| EMR                                | 146 (115–178)                                                | 230 (181–285)                                                    | 402 (316–490)                                          | 778 (618–948)                                       | 0.42 (0.32–0.54)                                     |
| EUR                                | 16.7 (13.8–20.1)                                             | 8.14 (7.13–9.16)                                                 | 11.6 (9.90–13.4)                                       | 36.5 (31.2–42.1)                                    | 0.006 (0.005–0.007)                                  |
| SEAR                               | 141 (109–178)                                                | 463 (368–570)                                                    | 386 (312–477)                                          | 990 (789–1222)                                      | 0.77 (0.62–0.94)                                     |
| WPR                                | 87.7 (74.6–102)                                              | 161 (130–192)                                                    | 228 (179–279)                                          | 477 (385–572)                                       | 0.29 (0.22–0.36)                                     |

Note: Values in parentheses represent equal-tailed 95% credible intervals. Total costs included patient direct medical, direct non-medical, and indirect costs (all undiscounted) in 2020 USD. Costs borne by TB-affected households are categorized as “catastrophic” if they exceed 20% of total household’s annual income.

<sup>a</sup> High-TB, high-TB/HIV (HIV-associated TB), and high-MDR/RR-TB (multidrug/rifampicin-resistant TB) burden countries as defined by the World Health Organization.

<sup>b</sup> LIC: Gross national income (GNI) per capita of \$1,085 or less; LMIC: GNI per capita of \$1,086 to \$4,225; UMIC: GNI per capita of \$4,256 to \$13,205 (World Bank 2021).

Note: All countries include 105 low- and middle-income countries analysed. AFR = African region; AMR = Region of the Americas; EMR = Eastern Mediterranean region; EUR = European region; GDP = gross domestic product; LIC = low-income; LMIC = lower middle-income; SEAR = Southeast Asian region; UMIC = upper middle-income; WPR = Western Pacific region.

**Appendix S16. Costs borne by TB-affected households averted and number of households with catastrophic costs averted by adolescent/adult tuberculosis vaccines (in millions), assuming costs for untreated cases are 0.5x treated cases.**

| Country grouping                   | Direct medical costs borne by TB-affected households averted | Direct non-medical costs borne by TB-affected households averted | Indirect costs borne by TB-affected households averted | Total costs borne by TB-affected households averted | Number of households with catastrophic costs averted |
|------------------------------------|--------------------------------------------------------------|------------------------------------------------------------------|--------------------------------------------------------|-----------------------------------------------------|------------------------------------------------------|
| All countries                      | 5727 (5360–6096)                                             | 11734 (11011–12476)                                              | 13356 (12584–14211)                                    | 30817 (29181–32592)                                 | 18.7 (17.6–20.0)                                     |
| High-TB burden <sup>a</sup>        | 4313 (3988–4636)                                             | 10067 (9358–10777)                                               | 10957 (10241–11712)                                    | 25337 (23755–26997)                                 | 16.5 (15.3–17.7)                                     |
| High-TB/HIV burden <sup>a</sup>    | 2894 (2644–3141)                                             | 8281 (7606–8967)                                                 | 9118 (8426–9856)                                       | 20293 (18746–21929)                                 | 14.0 (12.9–15.1)                                     |
| High-MDR/RR-TB burden <sup>a</sup> | 4405 (4075–4750)                                             | 9119 (8416–9817)                                                 | 10073 (9374–10810)                                     | 23598 (22050–25247)                                 | 14.5 (13.4–15.7)                                     |
| <b>Income level<sup>b</sup></b>    |                                                              |                                                                  |                                                        |                                                     |                                                      |
| LIC                                | 705 (625–794)                                                | 1339 (1229–1458)                                                 | 2323 (2064–2617)                                       | 4367 (3924–4826)                                    | 2.85 (2.60–3.09)                                     |
| LMIC                               | 3163 (2899–3427)                                             | 8197 (7537–8902)                                                 | 7480 (6863–8106)                                       | 18841 (17370–20375)                                 | 14.0 (12.8–15.1)                                     |
| UMIC                               | 1859 (1677–2053)                                             | 2197 (2049–2349)                                                 | 3554 (3172–3950)                                       | 7610 (6999–8190)                                    | 1.90 (1.71–2.09)                                     |
| <b>World region</b>                |                                                              |                                                                  |                                                        |                                                     |                                                      |
| AFR                                | 1496 (1383–1613)                                             | 3651 (3418–3893)                                                 | 5000 (4602–5453)                                       | 10148 (9466–10864)                                  | 6.77 (6.34–7.21)                                     |
| AMR                                | 361 (324–402)                                                | 457 (424–491)                                                    | 451 (416–489)                                          | 1269 (1179–1359)                                    | 0.27 (0.25–0.29)                                     |
| EMR                                | 687 (589–796)                                                | 1143 (969–1329)                                                  | 1797 (1533–2096)                                       | 3626 (3114–4177)                                    | 2.02 (1.68–2.37)                                     |
| EUR                                | 363 (312–422)                                                | 187 (169–204)                                                    | 258 (229–289)                                          | 807 (719–907)                                       | 0.13 (0.12–0.15)                                     |
| SEAR                               | 1371 (1165–1583)                                             | 4555 (3948–5185)                                                 | 3595 (3080–4114)                                       | 9522 (8178–10892)                                   | 7.33 (6.36–8.32)                                     |
| WPR                                | 1450 (1291–1609)                                             | 1740 (1594–1893)                                                 | 2255 (2021–2498)                                       | 5445 (4966–5939)                                    | 2.21 (1.95–2.49)                                     |

Note: Values in parentheses represent equal-tailed 95% credible intervals. Total costs included patient direct medical, direct non-medical, and indirect costs (all undiscounted) in 2020 USD. Costs borne by TB-affected households are categorized as “catastrophic” if they exceed 20% of total household’s annual income.

<sup>a</sup> High-TB, high-TB/HIV (HIV-associated TB), and high-MDR/RR-TB (multidrug/rifampicin-resistant TB) burden countries as defined by the World Health Organization.

<sup>b</sup> LIC: Gross national income (GNI) per capita of \$1,085 or less; LMIC: GNI per capita of \$1,086 to \$4,225; UMIC: GNI per capita of \$4,256 to \$13,205 (World Bank 2021).

Note: All countries include 105 low- and middle-income countries analysed. AFR = African region; AMR = Region of the Americas; EMR = Eastern Mediterranean region; EUR = European region; GDP = gross domestic product; LIC = low-income; LMIC = lower middle-income; SEAR = Southeast Asian region; UMIC = upper middle-income; WPR = Western Pacific region.

**Appendix S17. Total costs borne by TB-affected households averted in the base-case (Panel A) and assuming costs for untreated cases are 0.5x treated cases (Panel B) by within-country income quintile comparing infant vaccine to adolescent/adult vaccine.**

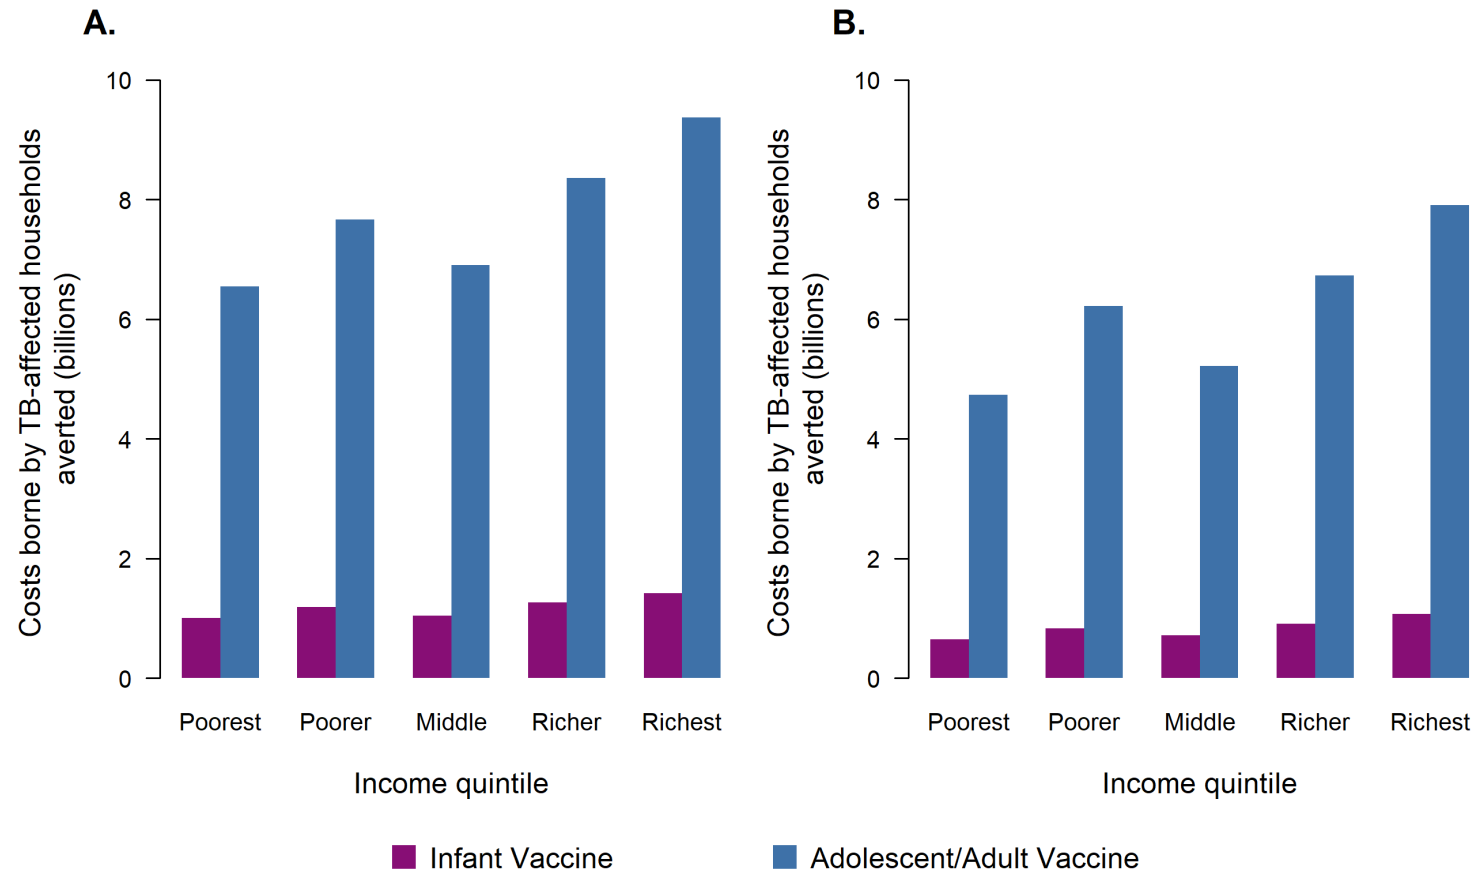

Note: Total costs included patient direct medical, direct non-medical, and indirect costs (all undiscounted) in 2020 USD.

**Appendix S18. Number of households with catastrophic costs averted in the base-case (Panel A) and assuming costs for untreated cases are 0.5x treated cases (Panel B) by within-country income quintile comparing infant vaccine to adolescent/adult vaccine.**

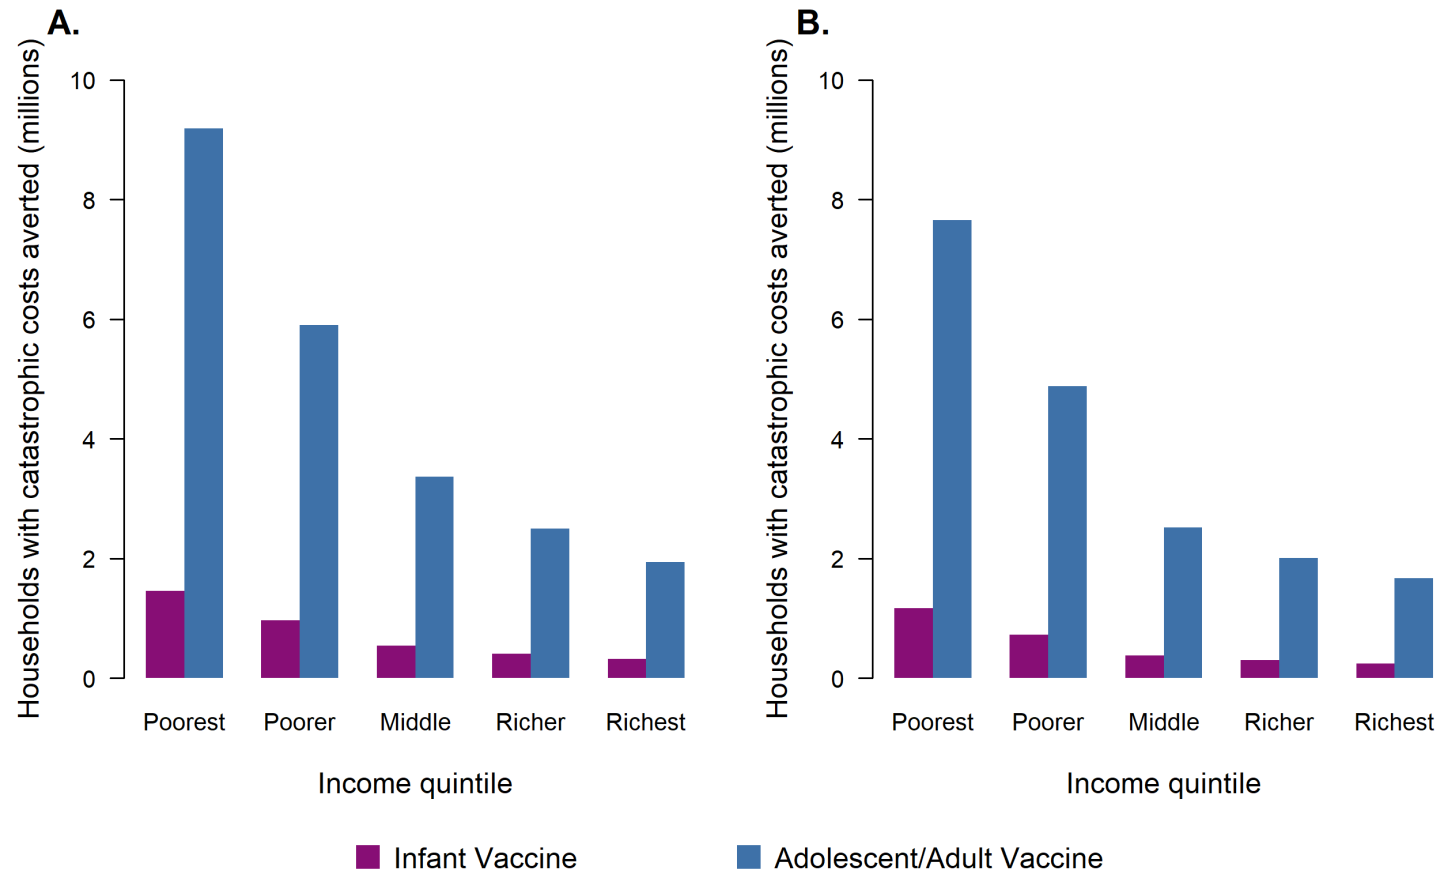

Note: Catastrophic costs included patient direct medical, direct non-medical, and indirect costs. Catastrophic costs are defined as instances where the patient costs incurred during an episode of TB disease exceed 20% of total annual household income.

**Appendix S19. Costs borne by TB-affected households averted and number of households with catastrophic costs averted by infant tuberculosis vaccines (in millions), assuming costs for untreated cases are 1.5x treated cases.**

| Country grouping                   | Direct medical costs borne by TB-affected households averted | Direct non-medical costs borne by TB-affected households averted | Indirect costs borne by TB-affected households averted | Total costs borne by TB-affected households averted | Number of households with catastrophic costs averted |
|------------------------------------|--------------------------------------------------------------|------------------------------------------------------------------|--------------------------------------------------------|-----------------------------------------------------|------------------------------------------------------|
| All countries                      | 1359 (1199–1504)                                             | 2958 (2629–3296)                                                 | 3329 (2984–3712)                                       | 7646 (6855–8491)                                    | 4.21 (3.75–4.68)                                     |
| High-TB burden <sup>a</sup>        | 1082 (934–1218)                                              | 2612 (2292–2949)                                                 | 2720 (2391–3071)                                       | 6413 (5651–7216)                                    | 3.80 (3.35–4.27)                                     |
| High-TB/HIV burden <sup>a</sup>    | 896 (752–1027)                                               | 2282 (1979–2607)                                                 | 2391 (2081–2734)                                       | 5569 (4807–6346)                                    | 3.26 (2.85–3.70)                                     |
| High-MDR/RR-TB burden <sup>a</sup> | 1041 (895–1177)                                              | 2343 (2030–2678)                                                 | 2465 (2147–2815)                                       | 5850 (5120–6649)                                    | 3.32 (2.89–3.77)                                     |
| <b>Income level<sup>b</sup></b>    |                                                              |                                                                  |                                                        |                                                     |                                                      |
| LIC                                | 225 (180–274)                                                | 399 (337–467)                                                    | 739 (596–895)                                          | 1364 (1119–1628)                                    | 0.66 (0.57–0.79)                                     |
| LMIC                               | 934 (794–1071)                                               | 2282 (1974–2615)                                                 | 2016 (1752–2322)                                       | 5232 (4526–5995)                                    | 3.29 (2.87–3.76)                                     |
| UMIC                               | 199 (170–230)                                                | 278 (221–340)                                                    | 574 (413–773)                                          | 1051 (813–1339)                                     | 0.26 (0.19–0.33)                                     |
| <b>World region</b>                |                                                              |                                                                  |                                                        |                                                     |                                                      |
| AFR                                | 667 (546–770)                                                | 1469 (1251–1674)                                                 | 1641 (1391–1895)                                       | 3777 (3221–4300)                                    | 2.03 (1.77–2.30)                                     |
| AMR                                | 32.2 (27.7–37.0)                                             | 31.2 (27.5–35.0)                                                 | 33.2 (29.4–37.5)                                       | 96.6 (85.9–108)                                     | 0.016 (0.014–0.018)                                  |
| EMR                                | 235 (179–291)                                                | 375 (282–472)                                                    | 624 (466–776)                                          | 1234 (935–1530)                                     | 0.55 (0.40–0.72)                                     |
| EUR                                | 27.0 (21.4–33.3)                                             | 12.9 (10.8–15.0)                                                 | 18.1 (14.8–21.7)                                       | 58.0 (47.3–69.7)                                    | 0.008 (0.007–0.010)                                  |
| SEAR                               | 241 (178–322)                                                | 798 (610–1028)                                                   | 640 (497–831)                                          | 1679 (1286–2181)                                    | 1.17 (0.91–1.49)                                     |
| WPR                                | 157 (131–187)                                                | 272 (214–336)                                                    | 372 (282–469)                                          | 802 (637–982)                                       | 0.43 (0.31–0.54)                                     |

Note: Values in parentheses represent equal-tailed 95% credible intervals. Total costs included patient direct medical, direct non-medical, and indirect costs (all undiscounted) in 2020 USD. Costs borne by TB-affected households are categorized as “catastrophic” if they exceed 20% of total household’s annual income.

<sup>a</sup> High-TB, high-TB/HIV (HIV-associated TB), and high-MDR/RR-TB (multidrug/rifampicin-resistant TB) burden countries as defined by the World Health Organization.

<sup>b</sup> LIC: Gross national income (GNI) per capita of \$1,085 or less; LMIC: GNI per capita of \$1,086 to \$4,225; UMIC: GNI per capita of \$4,256 to \$13,205 (World Bank 2021).

Note: All countries include 105 low- and middle-income countries analysed. AFR = African region; AMR = Region of the Americas; EMR = Eastern Mediterranean region; EUR = European region; GDP = gross domestic product; LIC = low-income; LMIC = lower middle-income; SEAR = Southeast Asian region; UMIC = upper middle-income; WPR = Western Pacific region.

**Appendix S20. Costs borne by TB-affected households averted and number of households with catastrophic costs averted by adolescent/adult tuberculosis vaccines (in millions), assuming costs for untreated cases are 1.5x treated cases.**

| Country grouping                   | Direct medical costs borne by TB-affected households averted | Direct non-medical costs borne by TB-affected households averted | Indirect costs borne by TB-affected households averted | Total costs borne by TB-affected households averted | Number of households with catastrophic costs averted |
|------------------------------------|--------------------------------------------------------------|------------------------------------------------------------------|--------------------------------------------------------|-----------------------------------------------------|------------------------------------------------------|
| All countries                      | 8777 (8141–9446)                                             | 18241 (16978–19648)                                              | 19883 (18497–21500)                                    | 46902 (43898–50346)                                 | 25.4 (23.6–27.2)                                     |
| High-TB burden <sup>a</sup>        | 6734 (6155–7304)                                             | 15691 (14430–17061)                                              | 16445 (15154–17918)                                    | 38869 (35905–42123)                                 | 22.5 (20.7–24.3)                                     |
| High-TB/HIV burden <sup>a</sup>    | 4720 (4260–5225)                                             | 13158 (11948–14530)                                              | 13896 (12627–15343)                                    | 31774 (28970–34823)                                 | 19.2 (17.5–21.0)                                     |
| High-MDR/RR-TB burden <sup>a</sup> | 6823 (6243–7448)                                             | 14232 (12967–15608)                                              | 15102 (13793–16555)                                    | 36158 (33232–39377)                                 | 19.9 (18.1–21.7)                                     |
| <b>Income level<sup>b</sup></b>    |                                                              |                                                                  |                                                        |                                                     |                                                      |
| LIC                                | 1048 (913–1192)                                              | 2033 (1831–2243)                                                 | 3362 (2924–3832)                                       | 6443 (5705–7218)                                    | 3.55 (3.22–3.89)                                     |
| LMIC                               | 5128 (4612–5664)                                             | 13059 (11839–14361)                                              | 11418 (10374–12493)                                    | 29605 (26902–32463)                                 | 19.3 (17.6–21.1)                                     |
| UMIC                               | 2601 (2323–2904)                                             | 3149 (2867–3444)                                                 | 5104 (4373–5891)                                       | 10854 (9736–11996)                                  | 2.47 (2.19–2.76)                                     |
| <b>World region</b>                |                                                              |                                                                  |                                                        |                                                     |                                                      |
| AFR                                | 2756 (2485–3067)                                             | 6517 (5951–7120)                                                 | 8194 (7342–9132)                                       | 17468 (15914–19164)                                 | 9.46 (8.77–10.2)                                     |
| AMR                                | 468 (416–524)                                                | 604 (555–655)                                                    | 576 (527–627)                                          | 1648 (1513–1782)                                    | 0.32 (0.30–0.35)                                     |
| EMR                                | 1006 (839–1187)                                              | 1678 (1371–1998)                                                 | 2526 (2063–3016)                                       | 5210 (4315–6144)                                    | 2.53 (2.05–3.08)                                     |
| EUR                                | 494 (414–590)                                                | 252 (223–282)                                                    | 342 (294–393)                                          | 1087 (940–1249)                                     | 0.16 (0.14–0.18)                                     |
| SEAR                               | 2006 (1650–2415)                                             | 6721 (5684–7838)                                                 | 5130 (4295–6059)                                       | 13856 (11616–16292)                                 | 9.97 (8.48–11.5)                                     |
| WPR                                | 2047 (1789–2334)                                             | 2469 (2208–2760)                                                 | 3116 (2715–3566)                                       | 7632 (6820–8553)                                    | 2.90 (2.50–3.39)                                     |

Note: Values in parentheses represent equal-tailed 95% credible intervals. Total costs included patient direct medical, direct non-medical, and indirect costs (all undiscounted) in 2020 USD. Costs borne by TB-affected households are categorized as “catastrophic” if they exceed 20% of total household’s annual income.

<sup>a</sup> High-TB, high-TB/HIV (HIV-associated TB), and high-MDR/RR-TB (multidrug/rifampicin-resistant TB) burden countries as defined by the World Health Organization.

<sup>b</sup> LIC: Gross national income (GNI) per capita of \$1,085 or less; LMIC: GNI per capita of \$1,086 to \$4,225; UMIC: GNI per capita of \$4,256 to \$13,205 (World Bank 2021).

Note: All countries include 105 low- and middle-income countries analysed. AFR = African region; AMR = Region of the Americas; EMR = Eastern Mediterranean region; EUR = European region; GDP = gross domestic product; LIC = low-income; LMIC = lower middle-income; SEAR = Southeast Asian region; UMIC = upper middle-income; WPR = Western Pacific region.

**Appendix S21. Total costs borne by TB-affected households averted in the base-case (Panel A) and assuming costs for untreated cases are 1.5x treated cases (Panel B) by within-country income quintile comparing infant vaccine to adolescent/adult vaccine.**

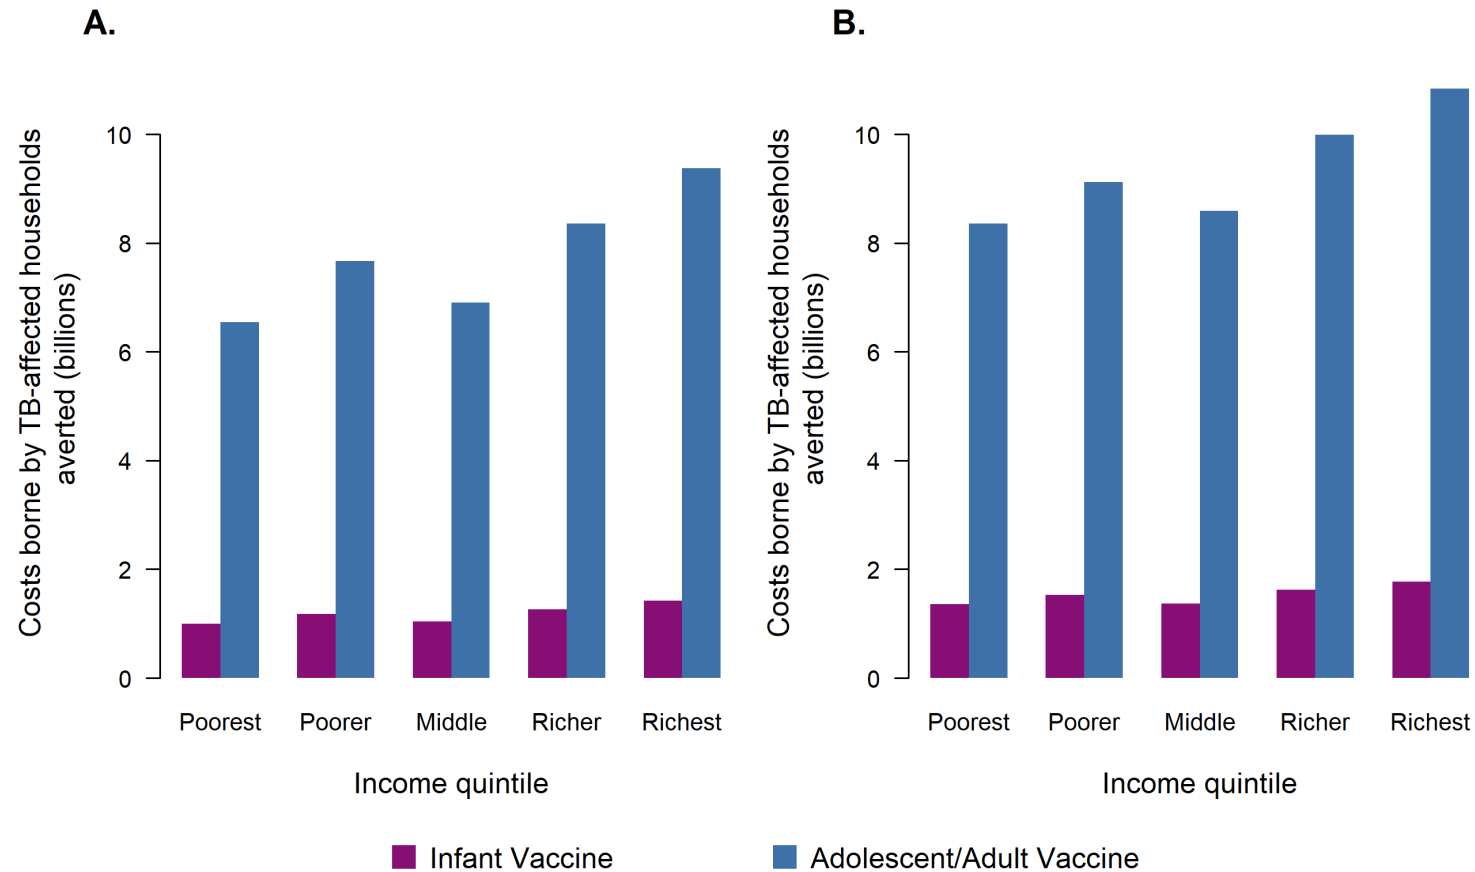

Note: Total costs included patient direct medical, direct non-medical, and indirect costs (all undiscounted) in 2020 USD.

**Appendix S22. Number of households with catastrophic costs averted in the base-case (Panel A) and assuming costs for untreated cases are 1.5x treated cases (Panel B) by within-country income quintile comparing infant vaccine to adolescent/adult vaccine.**

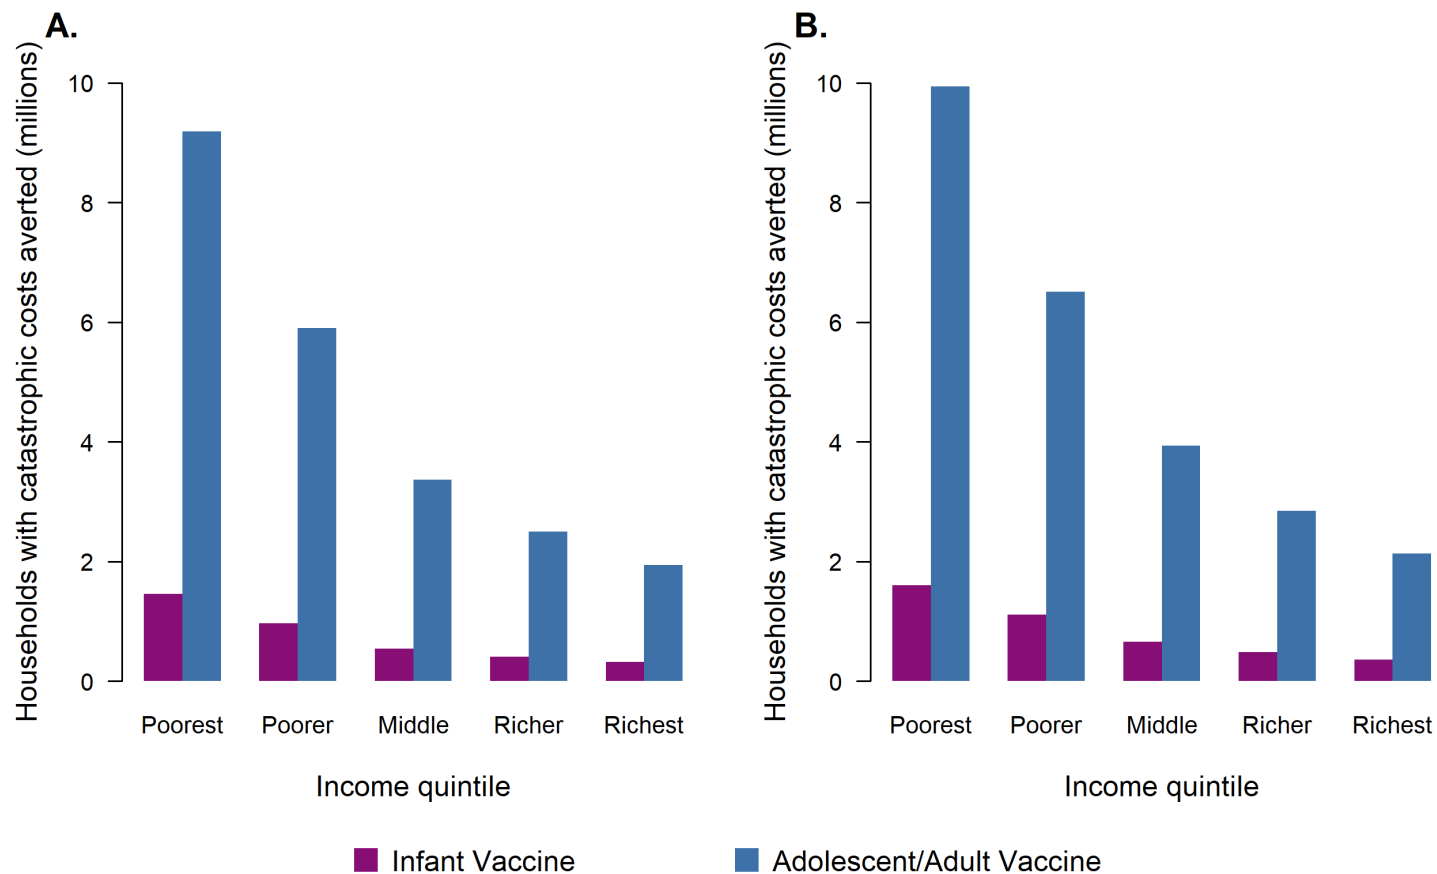

Note: Catastrophic costs included patient direct medical, direct non-medical, and indirect costs. Catastrophic costs are defined as instances where the patient costs incurred during an episode of TB disease exceed 20% of total annual household income.



**Appendix S23. Number of households with catastrophic costs averted by infant tuberculosis vaccines (in millions), assuming thresholds of 10%, 20% (base-case), and 25%.**

| Country grouping                   | 10% threshold                                                       |                                                      | 20% threshold                                                       |                                                      | 25% threshold                                                       |                                                      |
|------------------------------------|---------------------------------------------------------------------|------------------------------------------------------|---------------------------------------------------------------------|------------------------------------------------------|---------------------------------------------------------------------|------------------------------------------------------|
|                                    | Number of households with catastrophic direct medical costs averted | Number of households with catastrophic costs averted | Number of households with catastrophic direct medical costs averted | Number of households with catastrophic costs averted | Number of households with catastrophic direct medical costs averted | Number of households with catastrophic costs averted |
| All countries                      | 1.15 (1.02–1.28)                                                    | 5.10 (4.56–5.67)                                     | 0.63 (0.56–0.70)                                                    | 3.69 (3.31–4.08)                                     | 0.51 (0.45–0.57)                                                    | 3.20 (2.87–3.54)                                     |
| High-TB burden <sup>a</sup>        | 1.00 (0.87–1.12)                                                    | 4.64 (4.11–5.21)                                     | 0.53 (0.46–0.60)                                                    | 3.32 (2.94–3.70)                                     | 0.43 (0.37–0.48)                                                    | 2.86 (2.53–3.19)                                     |
| High-TB/HIV burden <sup>a</sup>    | 0.85 (0.73–0.97)                                                    | 3.94 (3.46–4.48)                                     | 0.46 (0.39–0.52)                                                    | 2.84 (2.50–3.21)                                     | 0.37 (0.31–0.42)                                                    | 2.46 (2.17–2.77)                                     |
| High-MDR/RR-TB burden <sup>a</sup> | 0.90 (0.77–1.02)                                                    | 4.06 (3.54–4.61)                                     | 0.48 (0.41–0.55)                                                    | 2.89 (2.53–3.27)                                     | 0.39 (0.33–0.44)                                                    | 2.49 (2.18–2.81)                                     |
| <b>Income level<sup>b</sup></b>    |                                                                     |                                                      |                                                                     |                                                      |                                                                     |                                                      |
| LIC                                | 0.20 (0.17–0.23)                                                    | 0.76 (0.65–0.90)                                     | 0.12 (0.10–0.14)                                                    | 0.61 (0.52–0.73)                                     | 0.10 (0.08–0.11)                                                    | 0.55 (0.47–0.66)                                     |
| LMIC                               | 0.89 (0.76–1.01)                                                    | 4.03 (3.52–4.60)                                     | 0.48 (0.41–0.54)                                                    | 2.85 (2.50–3.25)                                     | 0.38 (0.33–0.44)                                                    | 2.45 (2.15–2.79)                                     |
| UMIC                               | 0.07 (0.05–0.08)                                                    | 0.31 (0.23–0.39)                                     | 0.04 (0.03–0.04)                                                    | 0.23 (0.17–0.29)                                     | 0.03 (0.02–0.04)                                                    | 0.20 (0.15–0.26)                                     |
| <b>World region</b>                |                                                                     |                                                      |                                                                     |                                                      |                                                                     |                                                      |
| AFR                                | 0.58 (0.50–0.67)                                                    | 2.36 (2.05–2.67)                                     | 0.32 (0.27–0.37)                                                    | 1.78 (1.55–2.01)                                     | 0.26 (0.22–0.30)                                                    | 1.56 (1.36–1.77)                                     |
| AMR                                | 0.006 (0.005–0.007)                                                 | 0.020 (0.018–0.023)                                  | 0.004 (0.003–0.004)                                                 | 0.015 (0.013–0.016)                                  | 0.0030 (0.0026–0.0034)                                              | 0.013 (0.011–0.014)                                  |
| EMR                                | 0.19 (0.15–0.24)                                                    | 0.66 (0.48–0.86)                                     | 0.11 (0.09–0.14)                                                    | 0.51 (0.38–0.65)                                     | 0.09 (0.07–0.12)                                                    | 0.45 (0.34–0.58)                                     |
| EUR                                | 0.005 (0.004–0.006)                                                 | 0.011 (0.009–0.013)                                  | 0.003 (0.003–0.004)                                                 | 0.008 (0.006–0.009)                                  | 0.003 (0.002–0.003)                                                 | 0.007 (0.005–0.008)                                  |
| SEAR                               | 0.27 (0.21–0.35)                                                    | 1.50 (1.17–1.91)                                     | 0.14 (0.11–0.18)                                                    | 1.01 (0.80–1.28)                                     | 0.11 (0.08–0.14)                                                    | 0.86 (0.68–1.08)                                     |
| WPR                                | 0.09 (0.07–0.12)                                                    | 0.55 (0.41–0.69)                                     | 0.05 (0.04–0.06)                                                    | 0.37 (0.28–0.47)                                     | 0.04 (0.03–0.05)                                                    | 0.32 (0.24–0.40)                                     |

Note: Values in parentheses represent equal-tailed 95% credible intervals. Catastrophic costs are defined as instances where the patient costs (either direct medical only or total) incurred during an episode of TB disease exceed either 10%, 20%, or 25% of total annual household income.

<sup>a</sup> High-TB, high-TB/HIV (HIV-associated TB), and high-MDR/RR-TB (multidrug/rifampicin-resistant TB) burden countries as defined by the World Health Organization.

<sup>b</sup> LIC: Gross national income (GNI) per capita of \$1,085 or less; LMIC: GNI per capita of \$1,086 to \$4,225; UMIC: GNI per capita of \$4,256 to \$13,205 (World Bank 2021).

Note: All countries include 105 low- and middle-income countries analysed. AFR = African region; AMR = Region of the Americas; EMR = Eastern Mediterranean region; EUR = European region; GDP = gross domestic product; LIC = low-income; LMIC = lower middle-income; SEAR = Southeast Asian region; UMIC = upper middle-income; WPR = Western Pacific region.

**Appendix S24. Number of households with catastrophic costs averted by adolescent/adult tuberculosis vaccines (in millions), assuming thresholds of 10%, 20% (base-case), and 25%.**

| Country grouping                   | 10% threshold                                                       |                                                      | 20% threshold                                                       |                                                      | 25% threshold                                                       |                                                      |
|------------------------------------|---------------------------------------------------------------------|------------------------------------------------------|---------------------------------------------------------------------|------------------------------------------------------|---------------------------------------------------------------------|------------------------------------------------------|
|                                    | Number of households with catastrophic direct medical costs averted | Number of households with catastrophic costs averted | Number of households with catastrophic direct medical costs averted | Number of households with catastrophic costs averted | Number of households with catastrophic direct medical costs averted | Number of households with catastrophic costs averted |
| All countries                      | 6.97 (6.43–7.52)                                                    | 32.3 (30.0–34.6)                                     | 3.75 (3.46–4.05)                                                    | 22.9 (21.4–24.5)                                     | 3.01 (2.78–3.25)                                                    | 19.7 (18.4–21.1)                                     |
| High-TB burden <sup>a</sup>        | 5.91 (5.40–6.43)                                                    | 28.9 (26.7–31.2)                                     | 3.12 (2.85–3.40)                                                    | 20.2 (18.7–21.8)                                     | 2.48 (2.27–2.71)                                                    | 17.4 (16.0–18.7)                                     |
| High-TB/HIV burden <sup>a</sup>    | 4.89 (4.43–5.36)                                                    | 24.4 (22.3–26.7)                                     | 2.57 (2.32–2.84)                                                    | 17.3 (15.8–18.8)                                     | 2.05 (1.84–2.26)                                                    | 14.8 (13.6–16.1)                                     |
| High-MDR/RR-TB burden <sup>a</sup> | 5.41 (4.91–5.93)                                                    | 25.7 (23.4–28.0)                                     | 2.87 (2.60–3.15)                                                    | 17.9 (16.4–19.4)                                     | 2.29 (2.07–2.52)                                                    | 15.3 (14.0–16.6)                                     |
| <b>Income level<sup>b</sup></b>    |                                                                     |                                                      |                                                                     |                                                      |                                                                     |                                                      |
| LIC                                | 1.04 (0.95–1.15)                                                    | 4.20 (3.83–4.59)                                     | 0.60 (0.54–0.66)                                                    | 3.31 (3.02–3.62)                                     | 0.49 (0.44–0.55)                                                    | 2.97 (2.70–3.25)                                     |
| LMIC                               | 5.12 (4.62–5.62)                                                    | 24.9 (22.6–27.1)                                     | 2.71 (2.44–2.99)                                                    | 17.3 (15.8–18.8)                                     | 2.16 (1.95–2.38)                                                    | 14.8 (13.6–16.1)                                     |
| UMIC                               | 0.80 (0.72–0.88)                                                    | 3.21 (2.90–3.53)                                     | 0.44 (0.39–0.48)                                                    | 2.25 (2.01–2.50)                                     | 0.35 (0.32–0.39)                                                    | 1.94 (1.73–2.17)                                     |
| <b>World region</b>                |                                                                     |                                                      |                                                                     |                                                      |                                                                     |                                                      |
| AFR                                | 2.62 (2.41–2.86)                                                    | 11.3 (10.5–12.1)                                     | 1.44 (1.32–1.58)                                                    | 8.52 (7.93–9.16)                                     | 1.17 (1.06–1.28)                                                    | 7.49 (6.96–8.06)                                     |
| AMR                                | 0.12 (0.11–0.13)                                                    | 0.41 (0.38–0.44)                                     | 0.07 (0.06–0.07)                                                    | 0.30 (0.28–0.32)                                     | 0.06 (0.05–0.06)                                                    | 0.26 (0.24–0.28)                                     |
| EMR                                | 0.87 (0.73–1.03)                                                    | 3.11 (2.52–3.77)                                     | 0.51 (0.42–0.60)                                                    | 2.35 (1.92–2.83)                                     | 0.42 (0.35–0.49)                                                    | 2.08 (1.70–2.48)                                     |
| EUR                                | 0.10 (0.09–0.11)                                                    | 0.22 (0.20–0.24)                                     | 0.06 (0.05–0.07)                                                    | 0.15 (0.13–0.17)                                     | 0.05 (0.04–0.06)                                                    | 0.13 (0.11–0.15)                                     |
| SEAR                               | 2.40 (2.02–2.80)                                                    | 13.3 (11.4–15.3)                                     | 1.22 (1.02–1.42)                                                    | 8.94 (7.68–10.3)                                     | 0.96 (0.80–1.12)                                                    | 7.54 (6.48–8.64)                                     |
| WPR                                | 0.85 (0.75–0.96)                                                    | 3.92 (3.42–4.52)                                     | 0.45 (0.40–0.51)                                                    | 2.63 (2.29–3.04)                                     | 0.36 (0.32–0.41)                                                    | 2.23 (1.93–2.57)                                     |

Note: Values in parentheses represent equal-tailed 95% credible intervals. Catastrophic costs are defined as instances where the patient costs (either direct medical only or total) incurred during an episode of TB disease exceed either 10%, 20%, or 25% of total annual household income.

<sup>a</sup> High-TB, high-TB/HIV (HIV-associated TB), and high-MDR/RR-TB (multidrug/rifampicin-resistant TB) burden countries as defined by the World Health Organization.

<sup>b</sup> LIC: Gross national income (GNI) per capita of \$1,085 or less; LMIC: GNI per capita of \$1,086 to \$4,225; UMIC: GNI per capita of \$4,256 to \$13,205 (World Bank 2021).

Note: All countries include 105 low- and middle-income countries analysed. AFR = African region; AMR = Region of the Americas; EMR = Eastern Mediterranean region; EUR = European region; GDP = gross domestic product; LIC = low-income; LMIC = lower middle-income; SEAR = Southeast Asian region; UMIC = upper middle-income; WPR = Western Pacific region.

### Appendix S25. Partial rank correlation coefficients for the number of cases of catastrophic costs projected to be averted by the adolescent/adult TB vaccine.

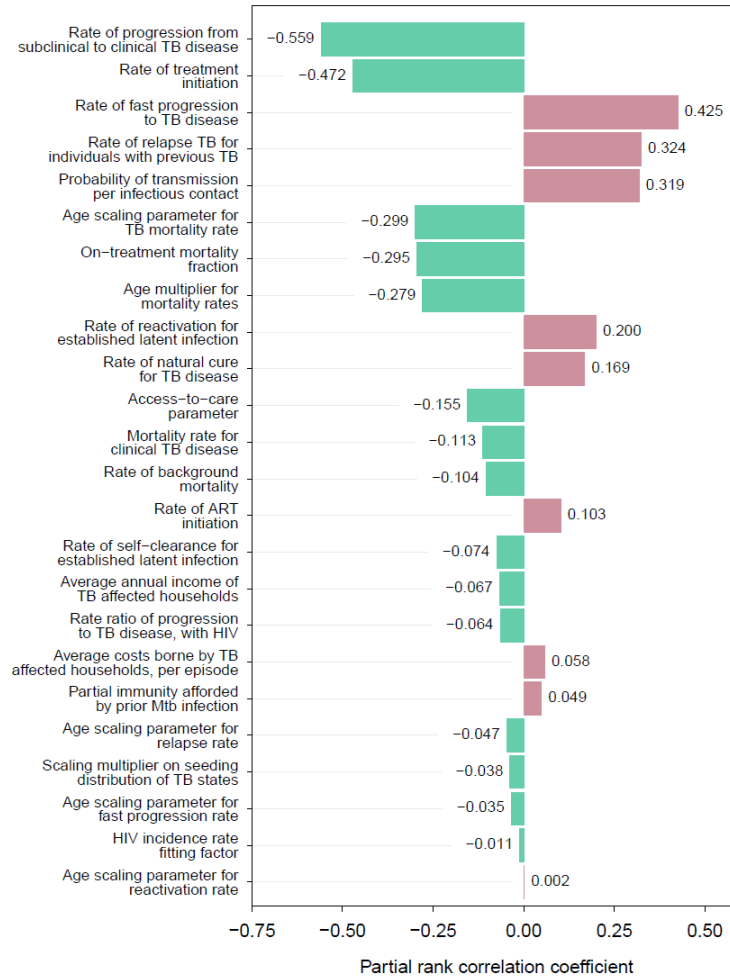

Note: TB = tuberculosis. HIV = Human Immunodeficiency Virus. ART = antiretroviral therapy for HIV. Negative (positive) values indicate a negative (positive) relationship with the outcome. Greater magnitude indicates a stronger relationship. Values in figure represent the median PRCC for each parameter across all individual country models.

### Appendix S26. Partial rank correlation coefficients for the number of cases of catastrophic costs projected to be averted by the infant TB vaccine.

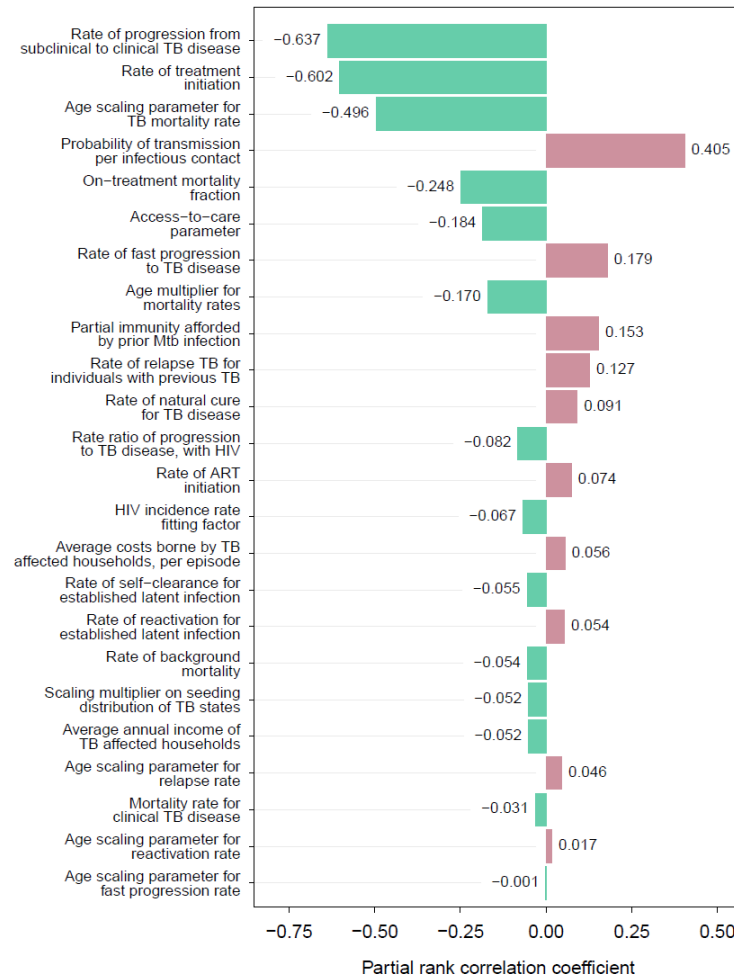

Note: TB = tuberculosis. HIV = Human Immunodeficiency Virus. ART = antiretroviral therapy for HIV. Negative (positive) values indicate a negative (positive) relationship with the outcome. Greater magnitude indicates a stronger relationship. Values in figure represent the median PRCC for each parameter across all individual country models.

## References

1. Clark RA, Mukandavire C, Portnoy A, Weerasuriya CK, Deol AK, Scarponi D, et al. The impact of alternative delivery strategies for novel tuberculosis vaccines in low- and middle-income countries: a modelling study. *Lancet Glob Health*. 2023;11(4):e546-e55.
2. Frascella B, Richards AS, Sossen B, Emery JC, Odone A, Law I, et al. Subclinical Tuberculosis Disease-A Review and Analysis of Prevalence Surveys to Inform Definitions, Burden, Associations, and Screening Methodology. *Clin Infect Dis*. 2021;73(3):e830-e41.
3. Emery JC, Richards AS, Dale KD, McQuaid CF, White RG, Denholm JT, et al. Self-clearance of Mycobacterium tuberculosis infection: implications for lifetime risk and population at-risk of tuberculosis disease. *Proc Biol Sci*. 2021;288(1943):20201635. <https://doi.org/10.1098/rspb.2020.1635>
4. World Health Organization. Guidelines for treatment of drug-susceptible tuberculosis and patient care: 2017 update. Last updated: 24 April 2017. Available at: <https://apps.who.int/iris/handle/10665/255052>
5. World Health Organization. Treatment of drug-susceptible tuberculosis: rapid communication. Last updated: 11 June 2021. Available at: <https://apps.who.int/iris/handle/10665/341729>
6. Kwan CK, Ernst JD. HIV and tuberculosis: a deadly human syndemic. *Clin Microbiol Rev*. 2011;24(2):351-76.
7. Vynnycky E, Fine PE. The natural history of tuberculosis: the implications of age-dependent risks of disease and the role of reinfection. *Epidemiol Infect*. 1997;119(2):183-201.
8. Suthar AB, Lawn SD, del Amo J, Getahun H, Dye C, Sculier D, et al. Antiretroviral therapy for prevention of tuberculosis in adults with HIV: a systematic review and meta-analysis. *PLoS Med*. 2012;9(7):e1001270.
9. Harling G, Ehrlich R, Myer L. The social epidemiology of tuberculosis in South Africa: a multilevel analysis. *Soc Sci Med*. 2008;66(2):492-505. <https://doi.org/10.1016/j.socscimed.2007.08.026>
10. Hoa NB, Tiemersma EW, Sy DN, Nhung NV, Gebhard A, Borgdorff MW, et al. Household expenditure and tuberculosis prevalence in VietNam: prediction by a set of household indicators. *Int J Tuberc Lung Dis*. 2011;15(1):32-7.
11. Hossain S, Quaiyum MA, Zaman K, Banu S, Husain MA, Islam MA, et al. Socio economic position in TB prevalence and access to services: results from a population prevalence survey and a facility-based survey in Bangladesh. *PLoS One*. 2012;7(9):e44980. <https://doi.org/10.1371/journal.pone.0044980>
12. Kapata N, Chanda-Kapata P, Ngosa W, Metitiri M, Klinkenberg E, Kalisvaart N, et al. The Prevalence of Tuberculosis in Zambia: Results from the First National TB

- Prevalence Survey, 2013-2014. *PLoS One*. 2016;11(1):e0146392.  
<https://doi.org/10.1371/journal.pone.0146392>
13. Migambi P, Gasana M, Uwizeye CB, Kamanzi E, Ndahindwa V, Kalisvaart N, et al. Prevalence of tuberculosis in Rwanda: Results of the first nationwide survey in 2012 yielded important lessons for TB control. *PLoS One*. 2020;15(4):e0231372.  
<https://doi.org/10.1371/journal.pone.0231372>
  14. Oxlade O, Murray M. Tuberculosis and poverty: why are the poor at greater risk in India? *PLoS One*. 2012;7(11):e47533. <https://doi.org/10.1371/journal.pone.0047533>
  15. Singh SK, Kashyap GC, Puri P. Potential effect of household environment on prevalence of tuberculosis in India: evidence from the recent round of a cross-sectional survey. *BMC Pulm Med*. 2018;18(1):66. <https://doi.org/10.1186/s12890-018-0627-3>
  16. Siroka A, Law I, Macinko J, Floyd K, Banda RP, Hoa NB, et al. The effect of household poverty on tuberculosis. *Int J Tuberc Lung Dis*. 2016;20(12):1603-8.  
<https://doi.org/10.5588/ijtld.16.0386>
  17. van Leth F, Guilatco RS, Hossain S, Van't Hoog AH, Hoa NB, van der Werf MJ, et al. Measuring socio-economic data in tuberculosis prevalence surveys. *Int J Tuberc Lung Dis*. 2011;15 Suppl 2:58-63. <https://doi.org/10.5588/ijtld.10.0417>
  18. Yates TA, Ayles H, Leacy FP, Schaap A, Boccia D, Beyers N, et al. Socio-economic gradients in prevalent tuberculosis in Zambia and the Western Cape of South Africa. *Trop Med Int Health*. 2018;23(4):375-90. <https://doi.org/10.1111/tmi.13038>
  19. Foster N, Nguyen HV, Nguyen NV, Nguyen HB, Tiemersma EW, Cobelens FGJ, et al. Social determinants of the changing tuberculosis prevalence in Việt Nam: Analysis of population-level cross-sectional studies. *PLoS Med*. 2022;19(3):e1003935.  
<https://doi.org/10.1371/journal.pmed.1003935>
  20. Iskauskas A. hmer: History Matching and Emulation Package. R package. 17 May 2022. Available at: <https://CRAN.R-project.org/package=hmer> (accessed 12 July 2022).
  21. Scarponi D, Iskauskas A, Clark RA, Vernon I, McKinley TJ, Goldstein M, et al. Demonstrating Multi-Country Calibration of a Tuberculosis Model Using New History Matching and Emulation Package - Hmer. medRxiv; 2022. doi: <https://doi.org/10.1101/2022.05.13.22275052>.
  22. Jabot F, Faure T, Dumoulin N, Albert C. EasyABC: Efficient Approximate Bayesian Computation Sampling Schemes. R package. 2015. Available at: <https://CRAN.R-project.org/package=EasyABC> (accessed April 2022).
  23. World Health Organization. WHO Preferred Product Characteristics for New Tuberculosis Vaccines. Geneva: World Health Organization. Licence: CC BY-NC-SA 3.0 IGO. 13 July 2018. <https://www.who.int/publications/i/item/WHO-IVB-18.06> (accessed 18 October 2021).

24. Abubakar I, Pimpin L, Ariti C, Beynon R, Mangtani P, Sterne JA, et al. Systematic review and meta-analysis of the current evidence on the duration of protection by bacillus Calmette-Guérin vaccination against tuberculosis. *Health Technol Assess*. 2013;17(37):1-372, v-vi.
25. Blackwood JC, Cummings DA, Broutin H, Iamsirithaworn S, Rohani P. Deciphering the impacts of vaccination and immunity on pertussis epidemiology in Thailand. *Proc Natl Acad Sci U S A*. 2013;110(23):9595-600.
26. Lewnard JA, Grad YH. Vaccine waning and mumps re-emergence in the United States. *Sci Transl Med*. 2018;10(433).
27. Gavi The Vaccine Alliance. Country hub. Geneva: Gavi, The Vaccine Alliance. <https://www.gavi.org/programmes-impact/country-hub> (accessed 15 April 2022).
28. UNICEF. Vaccination and Immunization Statistics. Last updated: July 2021. Available at: <https://data.unicef.org/topic/child-health/immunization/>
29. Harris RC, Sumner T, Knight GM, Zhang H, White RG. Potential impact of tuberculosis vaccines in China, South Africa, and India. *Sci Transl Med*. 2020;12(564). <https://doi.org/10.1126/scitranslmed.aax4607>
30. United Nations, Department of Economic and Social Affairs, Population Division. World Population Projections, 2019 Revision. Last updated: 28 August 2019. Available at: <https://population.un.org/wpp/Download/Standard/Population/>
31. Tiemersma EW, van der Werf MJ, Borgdorff MW, Williams BG, Nagelkerke NJ. Natural history of tuberculosis: duration and fatality of untreated pulmonary tuberculosis in HIV negative patients: a systematic review. *PLoS One*. 2011;6(4):e17601. <https://doi.org/10.1371/journal.pone.0017601>
32. Quaipe M, Houben R, Allwood B, Cohen T, Coussens AK, Harries AD, et al. Post-tuberculosis mortality and morbidity: valuing the hidden epidemic. *Lancet Respir Med*. 2020;8(4):332-3. [https://doi.org/10.1016/S2213-2600\(20\)30039-4](https://doi.org/10.1016/S2213-2600(20)30039-4)
33. World Health Organization. WHO TB incidence estimates disaggregated by age group, sex and risk factor. Last updated: December 2021. Available at: <https://www.who.int/teams/global-tuberculosis-programme/data>
34. World Health Organization. Case Notifications. Last updated: December 2021. Available at: <https://www.who.int/teams/global-tuberculosis-programme/data>
35. Emery J. Subclinical TB disease: lessons and questions from field to lab. Presentation at TB Science, 2020.
36. Abu-Raddad LJ, Sabatelli L, Achterberg JT, Sugimoto JD, Longini IM, Jr., Dye C, et al. Epidemiological benefits of more-effective tuberculosis vaccines, drugs, and diagnostics. *Proc Natl Acad Sci USA*. 2009;106(33):13980-5. <https://doi.org/10.1073/pnas.0901720106>



37. Dye C, Williams BG. Eliminating human tuberculosis in the twenty-first century. *J R Soc Interface*. 2008;5(23):653-62. <https://doi.org/10.1098/rsif.2007.1138>
38. Marx FM, Dunbar R, Enarson DA, Williams BG, Warren RM, van der Spuy GD, et al. The temporal dynamics of relapse and reinfection tuberculosis after successful treatment: a retrospective cohort study. *Clin Infect Dis*. 2014;58(12):1676-83. <https://doi.org/10.1093/cid/ciu186>
39. Gomes GM, Franco AO, Gomes MC, Medley GF. The reinfection threshold promotes variability in tuberculosis epidemiology and vaccine efficacy. *Proc Biol Sci*. 2004;271(1539):617-23. <https://doi.org/10.1098/rspb.2003.2606>
40. Dangisso MH, Woldeamayrat EM, Datiko DG, Lindtjørn B. Long-term outcome of smear-positive tuberculosis patients after initiation and completion of treatment: A ten-year retrospective cohort study. *PLoS One*. 2018;13(3):e0193396. <https://doi.org/10.1371/journal.pone.0193396>
41. World Health Organization. Treatment Outcomes. Last updated: December 2021. Available at: <https://www.who.int/teams/global-tuberculosis-programme/data>
42. Sutherland I, Svandová E, Radhakrishna S. The development of clinical tuberculosis following infection with tubercle bacilli. 1. A theoretical model for the development of clinical tuberculosis following infection, linking from data on the risk of tuberculous infection and the incidence of clinical tuberculosis in the Netherlands. *Tubercle*. 1982;63(4):255-68. [https://doi.org/10.1016/s0041-3879\(82\)80013-5](https://doi.org/10.1016/s0041-3879(82)80013-5)
43. Gomes GM, Rodrigues P, Hilker FM, Mantilla-Beniers NB, Muehlen M, Cristina Paulo A, et al. Implications of partial immunity on the prospects for tuberculosis control by post-exposure interventions. *J Theor Biol*. 2007;248(4):608-17. <https://doi.org/10.1016/j.jtbi.2007.06.005>
44. Mberi MN, Kuonza LR, Dube NM, Nattey C, Manda S, Summers R. Determinants of loss to follow-up in patients on antiretroviral treatment, South Africa, 2004-2012: a cohort study. *BMC Health Serv Res*. 2015;15:259. <https://doi.org/10.1186/s12913-015-0912-2>
45. Van Cutsem G, Ford N, Hildebrand K, Goemaere E, Mathee S, Abrahams M, et al. Correcting for mortality among patients lost to follow up on antiretroviral therapy in South Africa: a cohort analysis. *PLoS One*. 2011;6(2):e14684. <https://doi.org/10.1371/journal.pone.0014684>
46. Johansson KA, Robberstad B, Norheim OF. Further benefits by early start of HIV treatment in low income countries: survival estimates of early versus deferred antiretroviral therapy. *AIDS Res Ther*. 2010;7(1):3. <https://doi.org/10.1186/1742-6405-7-3>
47. Fatti G, Mothibi E, Meintjes G, Grimwood A. Antiretroviral treatment outcomes amongst older adults in a large multicentre cohort in South Africa. *PLoS One*. 2014;9(6):e100273. <https://doi.org/10.1371/journal.pone.0100273>



48. Vazquez F. A systematic review and meta-analysis of the effect of HIV status on the incidence of tuberculosis disease among individuals with latent Mycobacterium tuberculosis infection. [Masters Dissertation]. 2019.
49. Ackah AN, Coulibaly D, Digbeu H, Diallo K, Vetter KM, Coulibaly IM, et al. Response to treatment, mortality, and CD4 lymphocyte counts in HIV-infected persons with tuberculosis in Abidjan, Côte d'Ivoire. *Lancet*. 1995;345(8950):607-10. [https://doi.org/10.1016/s0140-6736\(95\)90519-7](https://doi.org/10.1016/s0140-6736(95)90519-7)
50. Mukadi YD, Maher D, Harries A. Tuberculosis case fatality rates in high HIV prevalence populations in sub-Saharan Africa. *Aids*. 2001;15(2):143-52. <https://doi.org/10.1097/00002030-200101260-00002>
51. World Health Organization. WHO releases new global lists of high-burden countries for TB, HIV-associated TB and drug-resistant TB. 17 June 2021. <https://www.who.int/news/item/17-06-2021-who-releases-new-global-lists-of-high-burden-countries-for-tb-hiv-associated-tb-and-drug-resistant-tb> (accessed 1 July 2021).
52. Portnoy A, Yamanaka T, Nguhiu P, Nishikiori N, Floyd K, Baena IG, et al. Costs incurred by people receiving TB treatment in low- and middle-income countries: a meta-regression analysis.
53. Vassall A, Sweeney S, Kahn J, Gomez GB, Bollinger L, Marseille E, et al. Global Health Costing Consortium reference case for estimating the costs of global health services and interventions. 2017. [https://ghcosting.org/pages/standards/reference\\_case](https://ghcosting.org/pages/standards/reference_case). (accessed 29 July 2022).
